# Supplementary material
Source: PubMed Central journal article supplement (PMC4332042)
Supplement: ic502535f_si_001.pdf [file ic502535f_si_001.pdf]

## Supporting Information

### Tuning the Reactivity of Fe<sup>V</sup>(O) Towards C-H bonds at Room Temperature: Effect of Water

Kundan K. Singh,<sup>a</sup> Mrityunjay k. Tiwari,<sup>b</sup> Munmun Ghosh,<sup>a</sup> Chakadola Panda,<sup>a</sup> Andrew Weitz,<sup>c</sup> Michael Hendrich,<sup>c</sup> Basab B. Dhar<sup>a</sup> Kumar Vanka<sup>b</sup> and Sayam Sen Gupta<sup>a</sup>

<sup>a</sup>Chemical Engineering Division, CSIR-National Chemical Laboratory, Pune 411008, India; <sup>b</sup>Physical and Materials Chemistry Division, CSIR-National Chemical Laboratory, Pune 411008, India; <sup>c</sup>Department of Chemistry, Carnegie Mellon University, 4400 Fifth Avenue, Pittsburgh, PA, USA

#### Table of Contents

|                                                                                               |         |
|-----------------------------------------------------------------------------------------------|---------|
| Figure SI 1(HR-MS spectra of <b>2</b> ).....                                                  | S2      |
| Figure SI 2 (Kinetics traces for reaction of <b>2</b> with toluene).....                      | S3      |
| Figure SI 3 (UV-vis spectral kinetics of <b>2</b> with toluene).....                          | S4      |
| Figure SI 4 (HR-MS spectra of <b>1</b> after completion of reaction with toluene).....        | S5      |
| Figure SI 5 (GC-MS trace for toluene reaction).....                                           | S6      |
| Figure SI 6 (HR-MS spectra of product of toluene reaction).....                               | S7      |
| Figure SI 7 (KIE for d <sub>8</sub> -toluene).....                                            | S8      |
| Figure SI 8 (Bar graph of $k_2$ for hydroxylation of 2,3-dimethylbutane vs. % of water )..... | S9      |
| Figure SI 9 (Kinetics traces for reaction of <b>2</b> with toluene in D <sub>2</sub> O).....  | S10     |
| Figure SI 10 (Optimized structures of reactants).....                                         | S11     |
| Table SI 1 (Rate constant, $k_2$ , for toluene reaction at different temperature).....        | S12     |
| Table SI 2-SI 8 (Data from DFT Study).....                                                    | S12-S17 |
| XYZ coordinates of all the stationary points of optimized structures.....                     | S18-S35 |

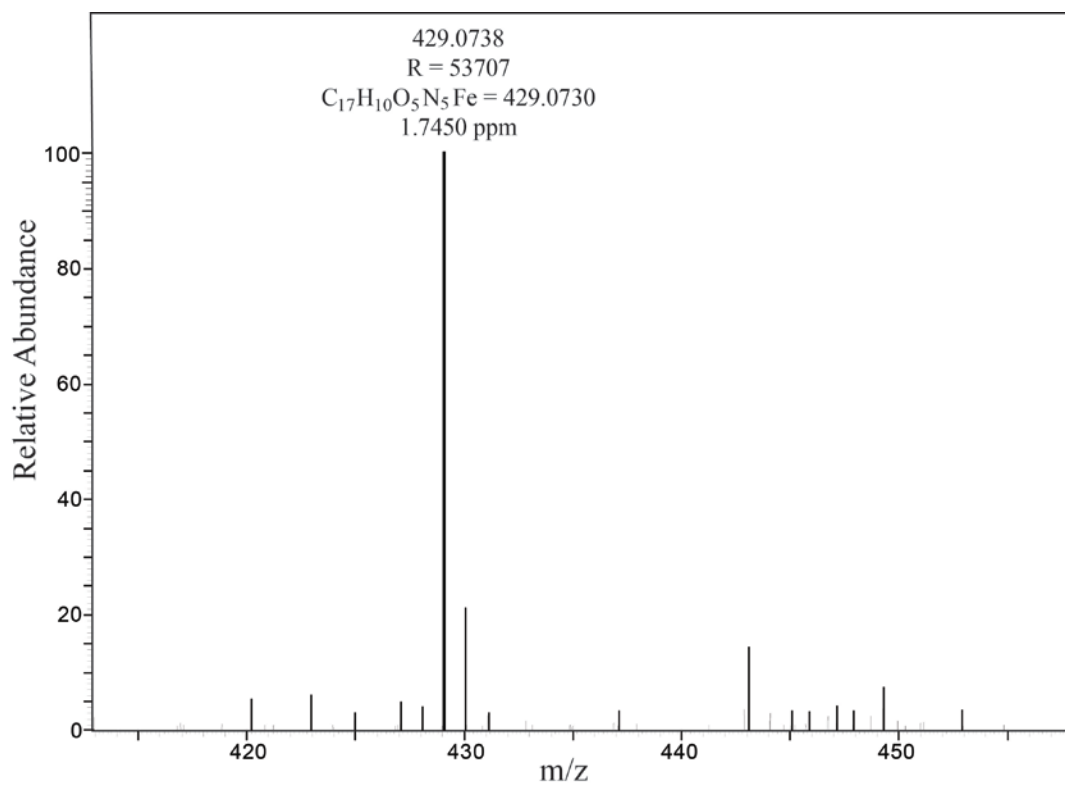

**Figure SI 1.** HR-MS of **2** in 30% H<sub>2</sub>O-CH<sub>3</sub>CN mixture. Calculated m/z of **2** is 429.0738

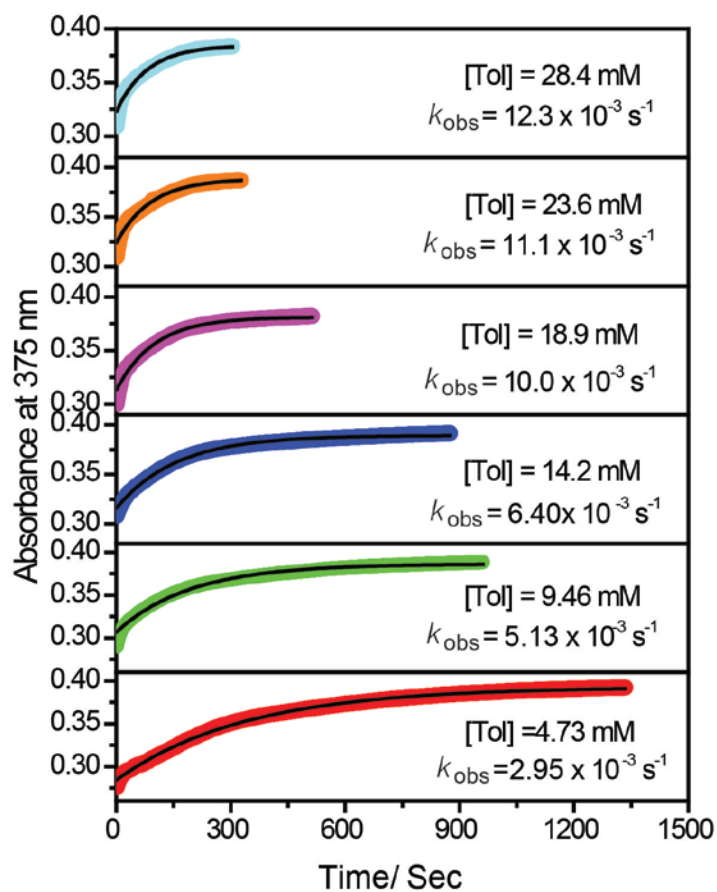

**Figure SI 2.** Kinetic traces for reaction of **2** with toluene at various toluene concentrations in 30% H<sub>2</sub>O-CH<sub>3</sub>CN. The kinetic traces were fitted to the equation,  $[(A_t = A_\alpha - (A_\alpha - A_o)e^{-(k_{\text{obs}}t)}]$  for obtaining  $k_{\text{obs}}$  values (black line).

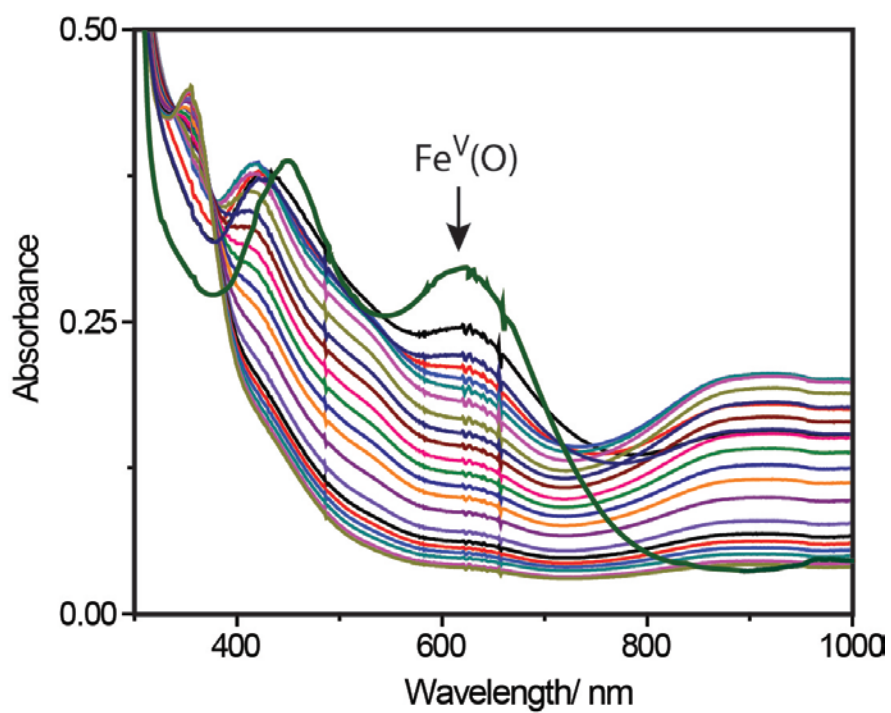

**Figure SI 3.** Uv-vis spectral changes associated with the reaction of **2** ( $10^{-4}$  M) with toluene (0.019 M) to Fe<sup>III</sup> / Fe<sup>IV</sup> in 50% H<sub>2</sub>O-CH<sub>3</sub>CN mixture at 25 °C.

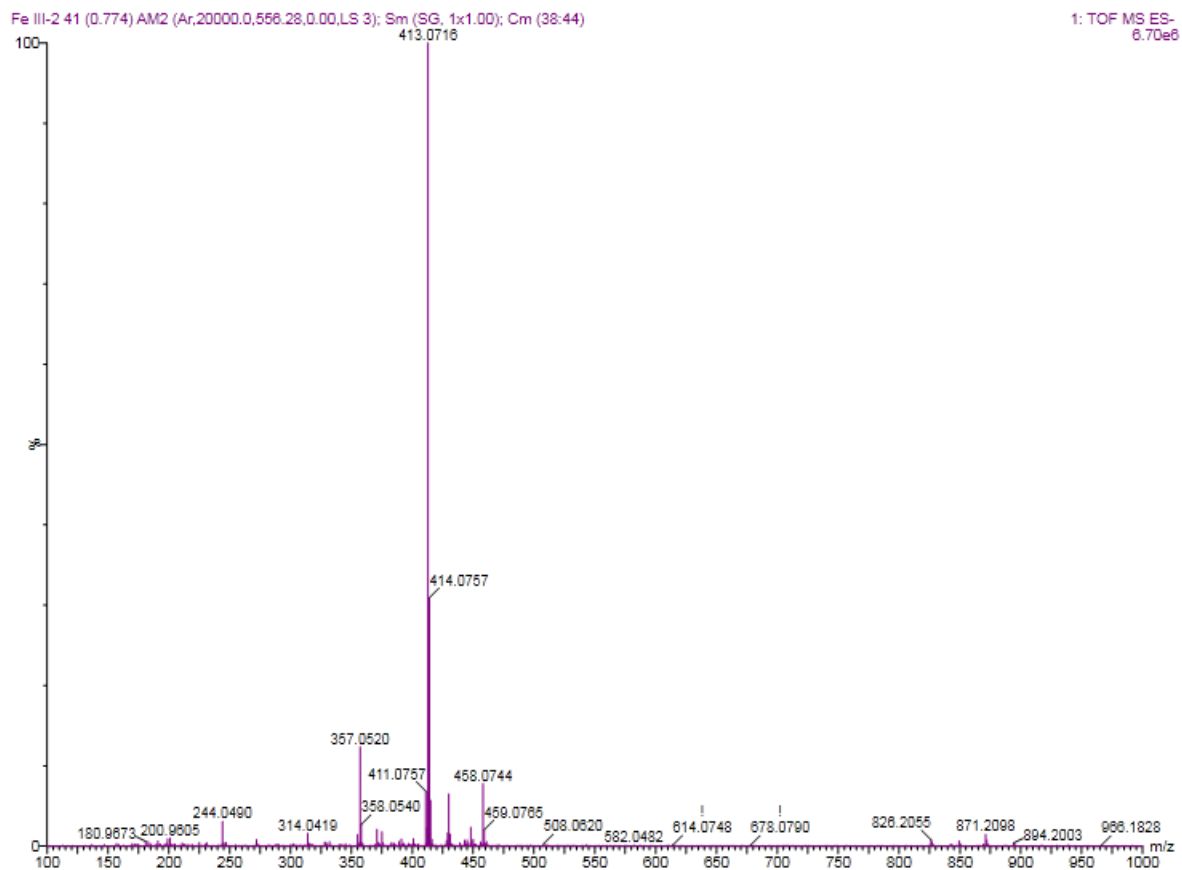

**Figure SI 4.** HR-MS of **1** in 30% H<sub>2</sub>O-CH<sub>3</sub>CN mixture after completion of reaction.

Calculated m/z of **1** is 413.0716

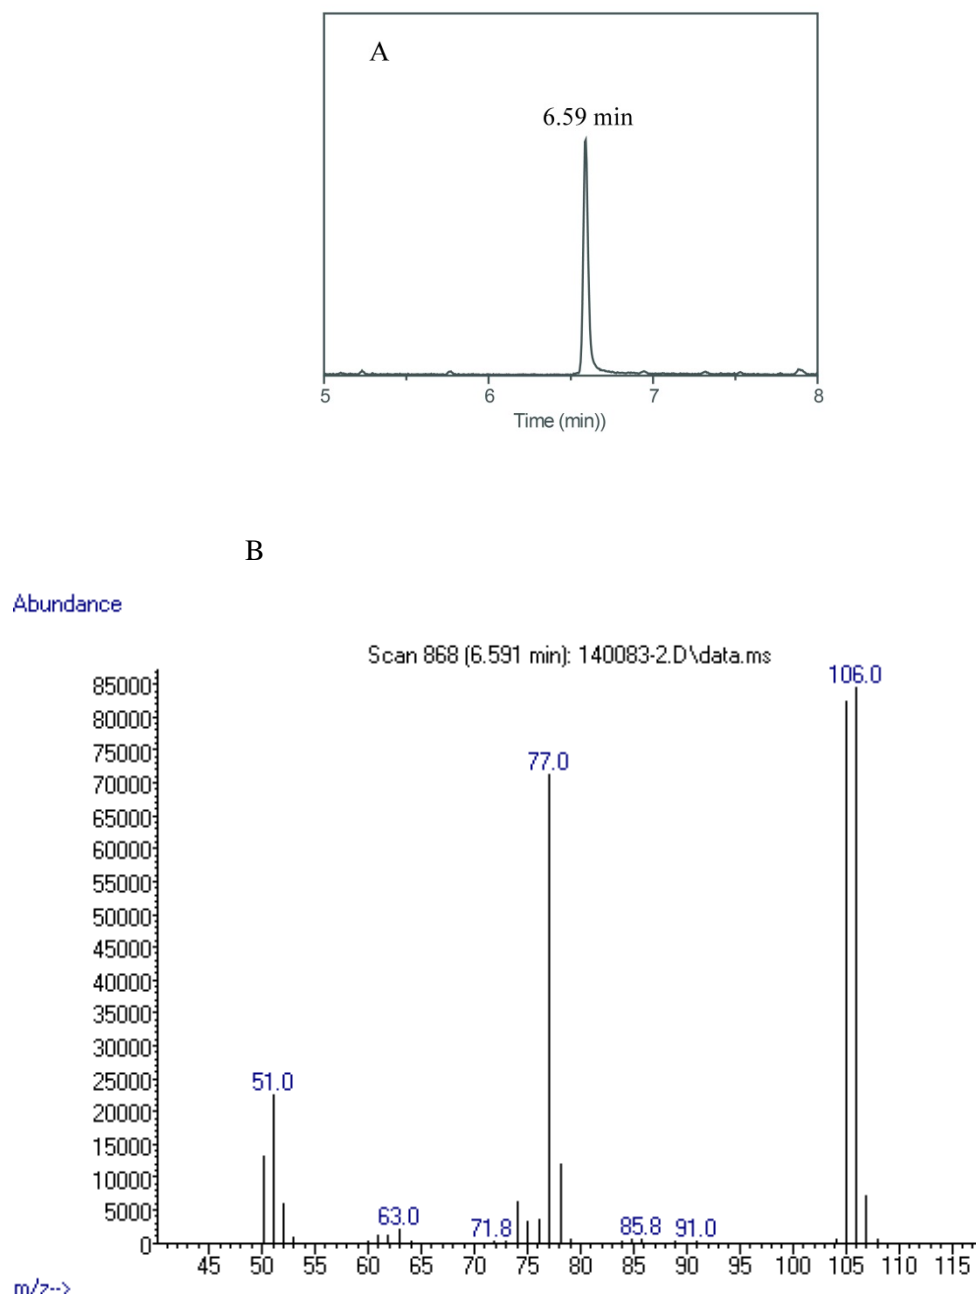

**Figure SI 5.** A. GC-MS trace for the product formed upon reaction of **2** ( $10^{-4}$  M) with toluene (1000 equivalent) in 30%  $\text{H}_2\text{O}-\text{CH}_3\text{CN}$  mixture. B. The mass shows presence of benzaldehyde at 6.59 minute retention time.

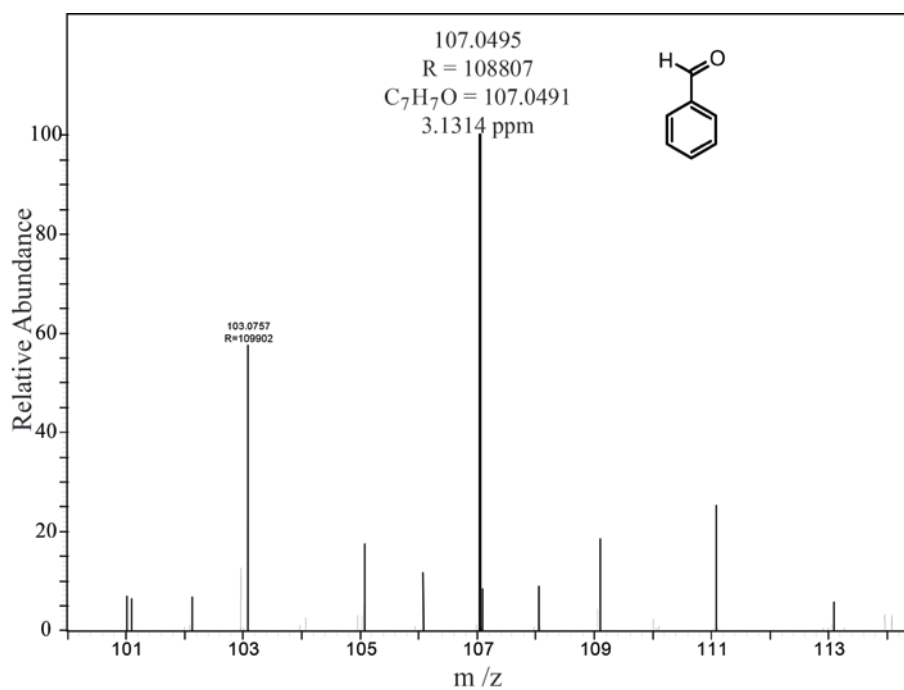

**Figure SI 6.** The HR-MS spectra of benzaldehyde obtained after reaction with Toluene (1000 equiv) and **2** ( $10^{-4}$  M) in 30 % H<sub>2</sub>O-CH<sub>3</sub>CN mixture.

**A**

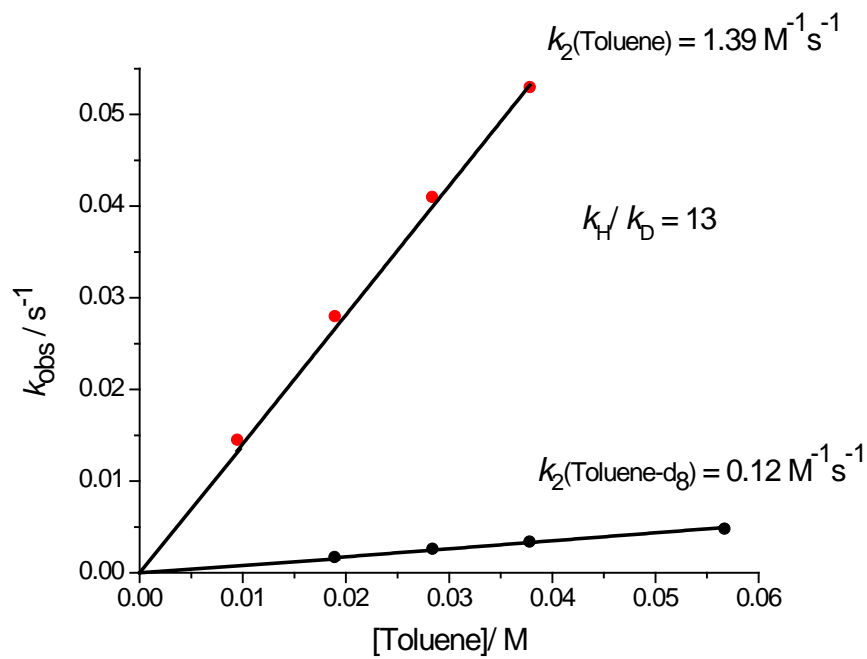

**B**

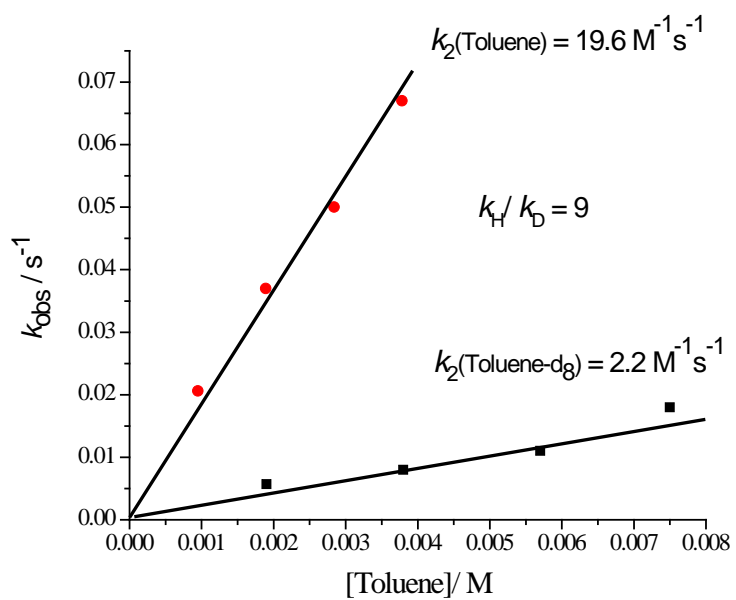



**Figure SI 7.** Plot of  $k_{\text{obs}}$  vs. [toluene] (red dots) and [ $d_8$ -toluene-] (black dots) showing pronounced KIE at 25 °C (A) in 50% H<sub>2</sub>O-CH<sub>3</sub>CN mixture; (B) in 70% H<sub>2</sub>O-CH<sub>3</sub>CN mixture.

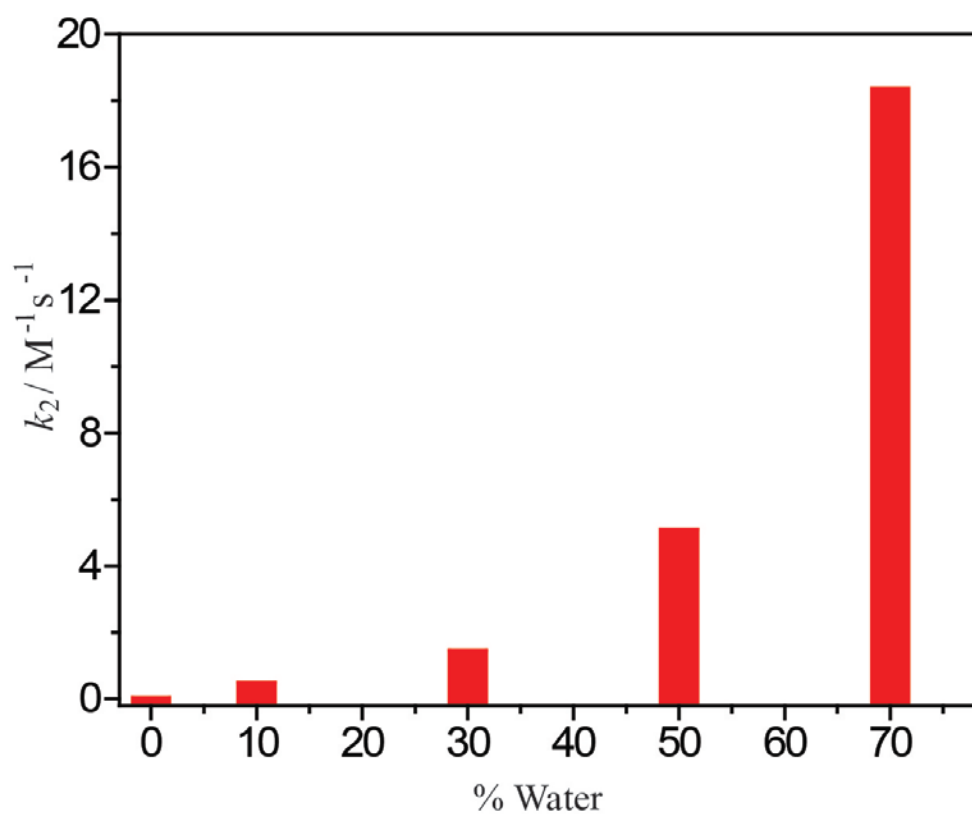

**Figure SI 8.** Second order rate constant ( $k_2$ ) for 2,3-Dimethylbutane oxidation vs. % of water content in H<sub>2</sub>O-CH<sub>3</sub>CN mixture.

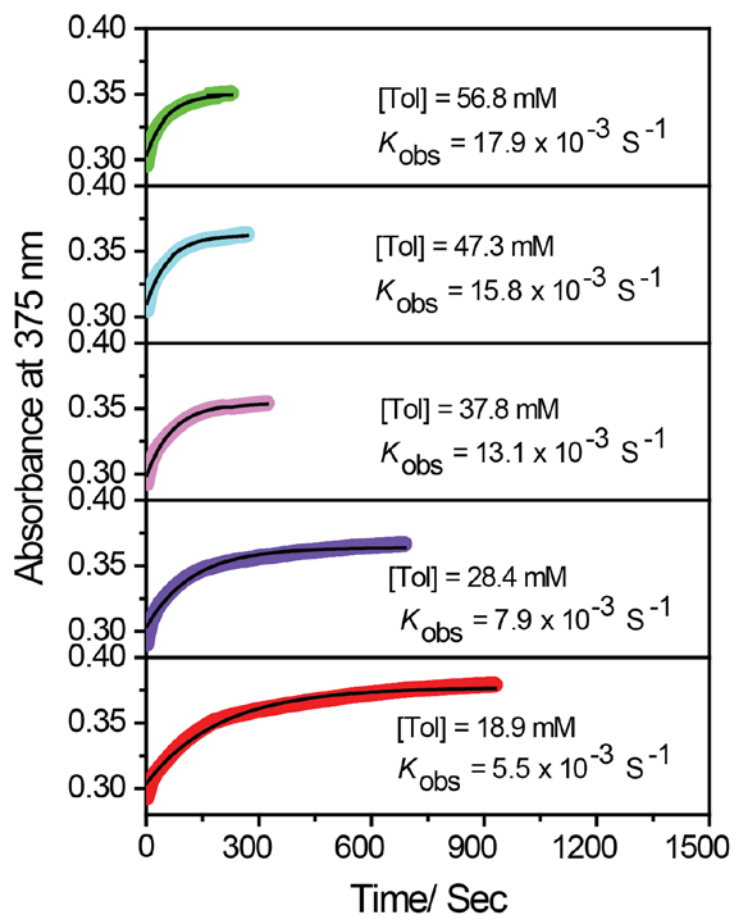

**Figure SI 9.** Kinetic traces for reaction of **2** with toluene at various toluene concentrations in 30% D<sub>2</sub>O-CH<sub>3</sub>CN. The kinetic traces were fitted to the equation,  $[A_t = A_\infty - (A_\infty - A_0)e^{-k_{obs}t}]$  for obtaining  $k_{obs}$  values (black line).

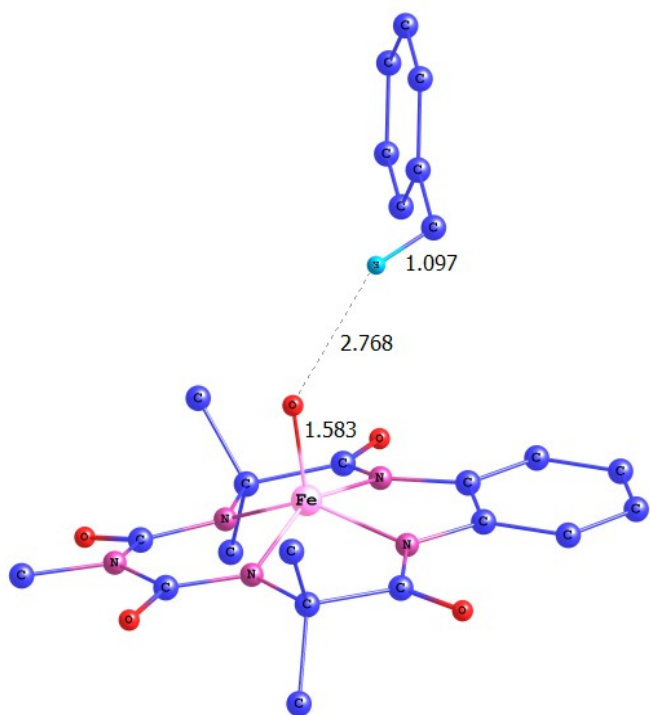

(i)

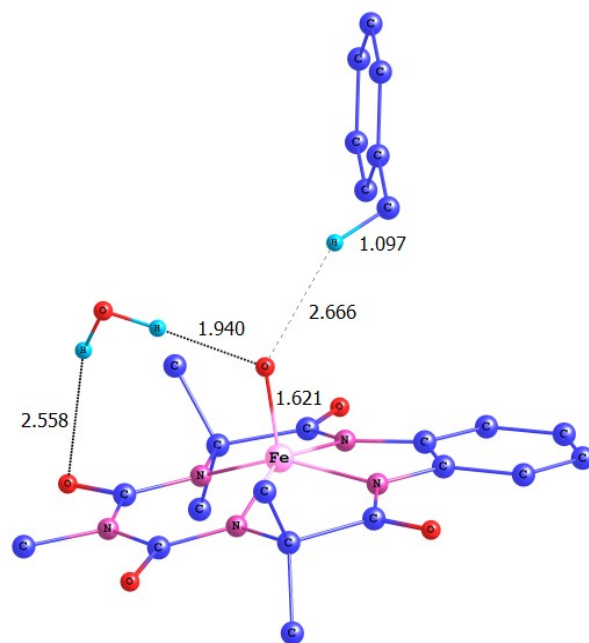

(ii)

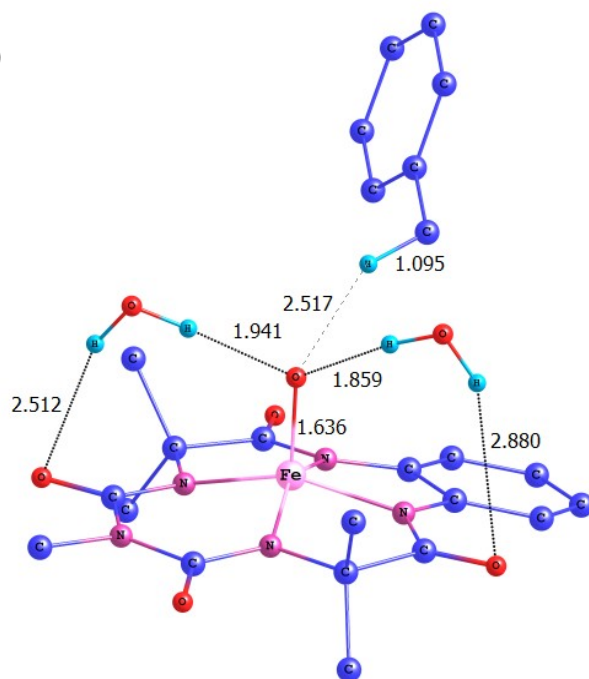

(iii)

**Figure SI 10.** (i), (ii), and (iii) are UB3LYP optimized reactant structures with none, one and two explicitly added water molecules respectively; all the atom-atom distances are in Å.

**Table SI 1.** Rate constant ( $k_2$ ) values for toluene oxidation in CH<sub>3</sub>CN and in 70 % of H<sub>2</sub>O-CH<sub>3</sub>CN mixture at different temperature.

| Temperature/ Kelvin | $k_2(\text{CH}_3\text{CN})/\text{M}^{-1}\text{s}^{-1}$ | $k_2(70\% \text{H}_2\text{O})/\text{M}^{-1}\text{s}^{-1}$ |
|---------------------|--------------------------------------------------------|-----------------------------------------------------------|
| 283                 | 0.04                                                   | 5.40                                                      |
| 288                 | 0.08                                                   | 9.40                                                      |
| 293                 | 0.13                                                   | 14.3                                                      |
| 300                 | 0.25                                                   | 19.6                                                      |

**Table SI 2.** The relative gas phase energies of the Fe<sup>V</sup>(O) (2) catalyst in doublet ( $S = 1/2$ ) and quartet ( $S = 3/2$ ) electronic states in kcal/mol at the UB3LYP/6-31G\*, LANL2DZ (Fe) and ROM062X/6-31G\*, LANL2DZ (Fe) level of theories.

|           | $\Delta E$<br>(UB3LYP) | $\Delta(E+ZPE)$<br>(UB3LYP) | $\Delta G$<br>(UB3LYP) | $\Delta E$<br>(ROM062X) |
|-----------|------------------------|-----------------------------|------------------------|-------------------------|
| $S = 1/2$ | 0.0                    | 0.0                         | 0.0                    | 0.0                     |
| $S = 3/2$ | 12.4                   | 11.2                        | 9.4                    | 6.0                     |

The energy values indicate that the Fe<sup>V</sup>(O) (2) complex is significantly more stable in the doublet electronic state than the quartet.

**Table SI 3.** The relative gas phase reaction energies in kcal/mol at the UB3LYP/6-31G\*, LANL2DZ (Fe) level of theory for toluene hydroxylation catalyzed by Fe<sup>V</sup>(O) (2).

|                   | R   | TS1  | I    | TS2  | P     |
|-------------------|-----|------|------|------|-------|
| $\Delta E^a$      | 0.0 | 17.2 | 4.1  | 11.2 | -15.1 |
| $\Delta(E+ZPE)^a$ | 0.0 | 13.1 | 1.9  | 9.5  | -14.0 |
| $\Delta G^a$      | 0.0 | 15.2 | 1.9  | 11.8 | -12.8 |
| $\Delta E^b$      | 0.0 | 32.8 | 1.3  | 4.1  | -41.9 |
| $\Delta(E+ZPE)^b$ | 0.0 | 28.8 | -0.2 | 2.2  | -39.7 |
| $\Delta G^b$      | 0.0 | 30.6 | -1.4 | 2.0  | -38.2 |
| $\Delta E^c$      | 0.0 | 17.2 | 4.3  | 7.1  | -38.8 |
| $\Delta(E+ZPE)^c$ | 0.0 | 13.1 | 2.0  | 4.3  | -37.5 |
| $\Delta G^c$      | 0.0 | 15.2 | 0.1  | 3.5  | -36.8 |

- a.  $S = 1/2$  spin state; b.  $S = 3/2$  spin state; c. most favorable energy profile when the spin flip occurs at an intermediate state.

These energy values clearly indicate that the intermediate in quartet state is more stable than the doublet state. This result is further confirmed by the separate optimization of the intermediate complex Fe<sup>IV</sup>(OH) radical in singlet and triplet spin states. The energy values are summarized in Table SI 4.

**Table SI 4.** The relative gas phase energies of the intermediate complex Fe<sup>IV</sup>(OH) in singlet and triplet electronic states in kcal/mol at the UB3LYP/6-31G\*, LANL2DZ (Fe) and ROM062X/6-31G\*, LANL2DZ (Fe) level of theories. Values outside the parenthesis are in gas phase and inside the parenthesis are in solvent phase.

|         | $\Delta E$<br>(UB3LYP) | $\Delta(E+ZPE)$<br>(UB3LYP) | $\Delta G$<br>(UB3LYP) | $\Delta E$<br>(ROM062X) |
|---------|------------------------|-----------------------------|------------------------|-------------------------|
| $S = 0$ | 0.0 (0.0)              | 0.0 (0.0)                   | 0.0 (0.0)              | 0.0 (0.0)               |
| $S = 1$ | -15.5 (-15.6)          | -16.2 (-16.3)               | -17.8 (-17.3)          | -18.7 (-18.5)           |

**Table SI 5** The relative reaction energies in kcal/mol for the rate determining step of toluene hydroxylation catalyzed by  $Fe^V(O)$  (**2**) in dielectric continuum of acetonitrile and water at the CPCM/UB3LYP/6-31G\*, LANL2DZ (Fe) and CPCM/ROM062X/6-31G\*, LANL2DZ (Fe) level of theories.

|             | $\Delta E$<br>(UB3LYP) | $\Delta(E+ZPE)$<br>(UB3LYP) | $\Delta G$<br>(UB3LYP) | $\Delta E$<br>(ROM062X) |
|-------------|------------------------|-----------------------------|------------------------|-------------------------|
| ${}^2R^a$   | 0.0                    | 0.0                         | 0.0                    | 0.0                     |
| ${}^2TS1^a$ | 17.2                   | 13.1                        | 15.2                   | 23.3                    |
| ${}^4I^a$   | 4.3                    | 2.0                         | 3.4                    | -5.3                    |
| ${}^2R^b$   | 0.0                    | 0.0                         | 0.0                    | 0.0                     |
| ${}^2TS1^b$ | 13.8                   | 9.9                         | 11.7                   | 18.7                    |
| ${}^4I^b$   | 1.1                    | -0.8                        | -0.9                   | -17.9                   |
| ${}^2R^c$   | 0.0                    | 0.0                         | 0.0                    | 0.0                     |
| ${}^2TS1^c$ | 13.7                   | 10.0                        | 12.3                   | 17.5                    |
| ${}^4I^c$   | 1.0                    | -0.9                        | -0.9                   | -18.0                   |

a. gas phase; b. in dielectric continuum of acetonitrile; c. in dielectric continuum of water

A marginal effect of solvent dielectric changing from pure acetonitrile to water on the rate determining barrier (RDB) at both UB3LYP and ROM062X level of theories are suggestive of a diminutive role of bulk solvation (macrosolvation) in the rate enhancement of the hydroxylation reaction with rising water concentration.

**Table SI 6.** The relative gas phase reaction energies in kcal/mol for the rate determining step of toluene hydroxylation catalyzed by Fe<sup>V</sup>(O) (**2**) with explicitly added water molecules at the UB3LYP/6-31G\*, LANL2DZ (Fe) and ROM062X/6-31G\*, LANL2DZ (Fe) level of theories.

|                               | $\Delta E$<br>(UB3LYP) | $\Delta(E+ZPE)$<br>(UB3LYP) | $\Delta G$<br>(UB3LYP) | $\Delta E$<br>(ROM062X) |
|-------------------------------|------------------------|-----------------------------|------------------------|-------------------------|
| <sup>2</sup> R <sup>a</sup>   | 0.0                    | 0.0                         | 0.0                    | 0.0                     |
| <sup>2</sup> TS1 <sup>a</sup> | 17.2                   | 13.1                        | 15.2                   | 23.3                    |
| <sup>4</sup> I <sup>a</sup>   | 4.3                    | 2.0                         | 3.4                    | -5.3                    |
| <sup>2</sup> R <sup>b</sup>   | 0.0                    | 0.0                         | 0.0                    | 0.0                     |
| <sup>2</sup> TS1 <sup>b</sup> | 16.1                   | 13.0                        | 16.3                   | 14.0                    |
| <sup>4</sup> I <sup>b</sup>   | 2.5                    | 1.2                         | 2.7                    | -21.9                   |
| <sup>2</sup> R <sup>c</sup>   | 0.0                    | 0.0                         | 0.0                    | 0.0                     |
| <sup>2</sup> TS1 <sup>c</sup> | 15.4                   | 12.6                        | 15.1                   | 11.2                    |
| <sup>4</sup> I <sup>c</sup>   | 0.9                    | 0.1                         | 0.2                    | -24.6                   |

- a. With no explicit water; b. with one explicit water; c. with two explicit water molecules

A clear decrease (by 9.3 kcal/mol) in the rate determining barrier (RDB) at the ROM062X level, which is known to provide a better treatment of the hydrogen bond, on inclusion of one explicit water and a further decrease of 2.8 kcal/mol on inclusion of the second explicit water are indicative that solute-solvent interactions through hydrogen bonding (microsolvation) is the main reason for the rate enhancement of the hydroxylation reaction with increase in the relative water concentration.

**Table SI 7.** Fe-O distances (in Å) in water bound reactant, transition state and intermediate structures obtained by geometry optimization at the UB3LYP/6-31G\*, LANL2DZ (Fe) level of theory.

|                  | Gas phase | CH <sub>3</sub> CN<br>dielectric | Water<br>dielectric | 1 H <sub>2</sub> O<br>explicit | 2H <sub>2</sub> O<br>explicit | 3H <sub>2</sub> O<br>explicit |
|------------------|-----------|----------------------------------|---------------------|--------------------------------|-------------------------------|-------------------------------|
| <sup>2</sup> R   | 1.583     | 1.590                            | 1.590               | 1.621                          | 1.636                         | 1.645                         |
| <sup>2</sup> TS1 | 1.703     | 1.696                            | 1.695               | 1.713                          | 1.723                         | -                             |
| <sup>4</sup> I   | 1.776     | 1.778                            | 1.778               | 1.792                          | 1.815                         | -                             |

The increase in Fe-O distance on increasing the explicit water molecules from 0 to 3 at the reactant structure is indicative of the reactivity of the Fe<sup>V</sup>(O) (**2**) complex with increase in the concentration of water.



**Table SI 8.** Mulliken population analysis of reactant, TS1 and intermediate with and without explicit water at UB3LYP/6-31gG\*, LANL2DZ(Fe) level of theory.

|                    |                | <sup>2</sup> R | <sup>2</sup> TS1 | <sup>4</sup> I |
|--------------------|----------------|----------------|------------------|----------------|
| Without water      | O <sub>1</sub> | -0.42286       | -0.54984         | -0.71367       |
|                    | Fe             | 0.767298       | 0.749967         | 0.766455       |
| One explicit water | O <sub>1</sub> | -0.50248       | -0.67346         | -0.74256       |
|                    | Fe             | 0.724989       | 0.728948         | 0.771006       |
|                    | H <sub>1</sub> | 0.463241       | 0.511496         | 0.45797        |
|                    | O              | -0.87027       | -0.87519         | -0.87547       |
|                    | H              | 0.411398       | 0.41589          | 0.414554       |
| Two explicit water | O <sub>1</sub> | -0.559         | -0.6607          | -0.77745       |
|                    | Fe             | 0.720593       | 0.760374         | 0.771028       |
|                    | H <sub>1</sub> | 0.47157        | 0.464143         | 0.461174       |
|                    | O              | -0.85732       | -0.87523         | -0.86243       |
|                    | H              | 0.400214       | 0.409659         | 0.416611       |
|                    | H <sub>1</sub> | 0.478431       | 0.457258         | 0.459801       |
|                    | O              | -0.85603       | -0.87664         | -0.87335       |
|                    | H              | 0.422106       | 0.414891         | 0.415717       |

O<sub>1</sub> : oxygen atom of Fe-O ; H<sub>1</sub> : Hydrogen atom of water molecule bonded with O<sub>1</sub> of Fe-O

The greater value of the negative Mulliken charge in TS1 at the oxo atom (first oxygen in each case) explains the key reason for the greater (electrostatic) stabilization of the transition state over the reactant through hydrogen bonding.

**XYZ coordinates of all the stationary points obtained by full optimization at UB3LYP/6-31G\*, LANL2DZ (Fe) level of theory**

**Doublet Reactant, gas**

|    |           |           |           |
|----|-----------|-----------|-----------|
| C  | 1.843327  | 3.824391  | 1.768575  |
| C  | 0.792962  | 4.590627  | 1.253422  |
| C  | -0.321119 | 3.981495  | 0.671598  |
| C  | -0.367923 | 2.582455  | 0.598324  |
| C  | 0.700621  | 1.805653  | 1.114309  |
| C  | 1.806660  | 2.429763  | 1.707882  |
| N  | -1.401465 | 1.785519  | 0.082106  |
| Fe | -1.012675 | -0.009849 | -0.136211 |
| N  | -0.947947 | -1.615742 | 0.757325  |
| C  | -1.775348 | -2.687895 | 0.494310  |
| N  | -2.889976 | -2.519778 | -0.337485 |
| C  | -3.610522 | -3.764698 | -0.620823 |
| N  | 0.448114  | 0.443327  | 0.990212  |
| C  | 1.084352  | -0.568662 | 1.627342  |
| O  | 2.134775  | -0.485523 | 2.272530  |
| C  | -2.599627 | 2.237500  | -0.422382 |
| O  | -2.918192 | 3.420156  | -0.516880 |
| C  | -3.520993 | 1.101406  | -0.886628 |
| C  | -4.866175 | 1.292376  | -0.151686 |
| N  | -2.859720 | -0.165784 | -0.526846 |
| C  | -3.523474 | -1.320352 | -0.764439 |
| O  | -4.634751 | -1.403778 | -1.305972 |
| C  | -3.698797 | 1.250295  | -2.415145 |
| C  | 0.317541  | -1.898062 | 1.493386  |
| C  | 1.226656  | -2.877337 | 0.719743  |
| C  | 0.047976  | -2.392695 | 2.930572  |
| O  | -0.311168 | -0.181609 | -1.544283 |
| O  | -1.555082 | -3.819867 | 0.941609  |
| H  | 2.410711  | 0.269946  | -1.759079 |
| H  | -2.738162 | 1.106384  | -2.922181 |
| H  | -4.070448 | 2.254533  | -2.644469 |
| H  | -4.404585 | 0.499153  | -2.773859 |
| H  | -5.598235 | 0.570984  | -0.514637 |
| H  | -5.221883 | 2.313176  | -0.320835 |
| H  | -4.729688 | 1.147030  | 0.926610  |
| H  | -1.144581 | 4.559742  | 0.276990  |
| H  | 0.837578  | 5.676159  | 1.302521  |
| H  | -4.359844 | -3.543716 | -1.376424 |
| H  | 1.375761  | -2.524849 | -0.307218 |
| H  | 2.201743  | -2.918316 | 1.215406  |
| H  | 0.780058  | -3.871994 | 0.693475  |
| H  | -0.395406 | -3.387886 | 2.912803  |
| H  | 0.995368  | -2.406359 | 3.477810  |

|   |           |           |           |
|---|-----------|-----------|-----------|
| H | -0.636455 | -1.706126 | 3.442710  |
| H | 2.600574  | 1.817536  | 2.114710  |
| H | 2.702370  | 4.314722  | 2.220878  |
| H | -4.099194 | -4.150730 | 0.280956  |
| H | -2.905258 | -4.520405 | -0.971503 |
| C | 3.301845  | 0.909357  | -1.736209 |
| H | 3.119818  | 1.663024  | -0.961250 |
| C | 4.557489  | 0.118239  | -1.450550 |
| H | 3.367479  | 1.424427  | -2.701041 |
| C | 5.571888  | -0.004063 | -2.409399 |
| C | 6.731507  | -0.738817 | -2.148076 |
| C | 6.896718  | -1.367352 | -0.913621 |
| C | 5.892878  | -1.252923 | 0.052565  |
| C | 4.736259  | -0.518430 | -0.210719 |
| H | 5.450185  | 0.483436  | -3.374959 |
| H | 7.504058  | -0.818060 | -2.910188 |
| H | 7.797230  | -1.940680 | -0.705172 |
| H | 6.008931  | -1.737893 | 1.019074  |
| H | 3.965503  | -0.438636 | 0.553044  |

**Quartet Reactant, gas**

|    |           |           |           |
|----|-----------|-----------|-----------|
| C  | 2.049807  | 3.494912  | 2.187521  |
| C  | 1.145550  | 4.390652  | 1.567554  |
| C  | 0.053897  | 3.928347  | 0.854627  |
| C  | -0.159462 | 2.533191  | 0.746581  |
| C  | 0.769347  | 1.613568  | 1.382203  |
| C  | 1.874863  | 2.124409  | 2.102735  |
| N  | -1.182214 | 1.895186  | 0.110446  |
| Fe | -1.034922 | -0.005376 | 0.012156  |
| N  | -1.043747 | -1.725752 | 0.714591  |
| C  | -1.936311 | -2.701427 | 0.383267  |
| N  | -3.089416 | -2.335559 | -0.362246 |
| C  | -3.940418 | -3.485071 | -0.689528 |
| N  | 0.418888  | 0.306404  | 1.209932  |
| C  | 1.016892  | -0.825880 | 1.717233  |
| O  | 2.074134  | -0.853301 | 2.347065  |
| C  | -2.293844 | 2.438401  | -0.502255 |
| O  | -2.505818 | 3.638521  | -0.655262 |
| C  | -3.298131 | 1.356893  | -0.983385 |
| C  | -4.668728 | 1.738222  | -0.381534 |
| N  | -2.824450 | 0.030780  | -0.505817 |
| C  | -3.585136 | -1.065902 | -0.781600 |
| O  | -4.680878 | -1.024236 | -1.360880 |
| C  | -3.330807 | 1.424993  | -2.527320 |

|                         |           |           |           |    |           |           |           |
|-------------------------|-----------|-----------|-----------|----|-----------|-----------|-----------|
| C                       | 0.201650  | -2.113734 | 1.425742  | O  | 0.512782  | 3.975081  | -0.264855 |
| C                       | 1.087683  | -3.034037 | 0.557158  | N  | -0.445823 | -0.529084 | -1.475605 |
| C                       | -0.092045 | -2.761455 | 2.797862  | C  | -0.373869 | -1.830010 | -1.881341 |
| O                       | -0.194430 | -0.130486 | -1.394214 | O  | -1.145209 | -2.391103 | -2.661277 |
| O                       | -1.818233 | -3.896711 | 0.690758  | Fe | 0.741385  | 0.017576  | -0.119345 |
| H                       | 2.215053  | 0.388785  | -1.617031 | N  | 1.617071  | -1.582227 | -0.477108 |
| H                       | -2.352724 | 1.143111  | -2.931808 | C  | 2.762018  | -2.008382 | 0.136289  |
| H                       | -3.569256 | 2.444460  | -2.849416 | N  | 3.491220  | -1.085590 | 0.921591  |
| H                       | -4.085370 | 0.732272  | -2.904853 | C  | 4.652485  | -1.679759 | 1.591193  |
| H                       | -5.439314 | 1.068590  | -0.762268 | O  | -0.136142 | -0.281188 | 1.309760  |
| H                       | -4.902327 | 2.775038  | -0.641934 | N  | 2.278428  | 0.911622  | 0.470704  |
| H                       | -4.636800 | 1.653801  | 0.711696  | C  | 2.128011  | 2.379801  | 0.603298  |
| H                       | -0.648200 | 4.597753  | 0.375349  | C  | 3.288059  | 3.144404  | -0.071361 |
| H                       | 1.314388  | 5.461439  | 1.652451  | C  | 3.372862  | 0.326187  | 1.030716  |
| H                       | -4.745175 | -3.127918 | -1.325860 | O  | 4.265472  | 0.945456  | 1.627542  |
| H                       | 1.278398  | -2.561334 | -0.412196 | C  | 1.963515  | 2.811780  | 2.077733  |
| H                       | 2.044899  | -3.210746 | 1.058716  | C  | 0.833073  | -2.570116 | -1.259087 |
| H                       | 0.573842  | -3.983366 | 0.395242  | C  | 0.267469  | -3.690821 | -0.358997 |
| H                       | -0.599966 | -3.714631 | 2.652139  | C  | 1.644255  | -3.157585 | -2.433940 |
| H                       | 0.847895  | -2.910119 | 3.338434  | O  | 3.201832  | -3.163724 | 0.060893  |
| H                       | -0.737576 | -2.105363 | 3.394540  | C  | -2.237264 | 1.075070  | 1.759560  |
| H                       | 2.556893  | 1.426858  | 2.570772  | C  | -3.337554 | 0.133134  | 1.977329  |
| H                       | 2.899102  | 3.891508  | 2.738580  | C  | -3.624535 | -0.368635 | 3.264336  |
| H                       | -4.350497 | -3.933671 | 0.221780  | C  | -4.659539 | -1.277373 | 3.465445  |
| H                       | -3.348692 | -4.250576 | -1.197355 | C  | -5.430308 | -1.714244 | 2.383169  |
| C                       | 3.134966  | 0.983640  | -1.681767 | C  | -5.152983 | -1.235230 | 1.098391  |
| H                       | 3.071838  | 1.744845  | -0.893902 | C  | -4.120031 | -0.324825 | 0.894804  |
| C                       | 4.376317  | 0.137561  | -1.519260 | H  | -1.174024 | 0.377588  | 1.479283  |
| H                       | 3.131216  | 1.501105  | -2.647449 | H  | 1.155860  | 2.238389  | 2.547038  |
| C                       | 5.342916  | 0.063066  | -2.531024 | H  | 1.709442  | 3.876275  | 2.118195  |
| C                       | 6.493760  | -0.714975 | -2.379346 | H  | 2.889968  | 2.627386  | 2.624133  |
| C                       | 6.699203  | -1.437094 | -1.203569 | H  | 4.217568  | 2.971013  | 0.470932  |
| C                       | 5.742905  | -1.373532 | -0.185906 | H  | 3.048922  | 4.212063  | -0.087475 |
| C                       | 4.595182  | -0.595907 | -0.341006 | H  | 3.411474  | 2.801994  | -1.105752 |
| H                       | 5.189692  | 0.622806  | -3.451780 | H  | -1.477093 | 3.834704  | -1.439955 |
| H                       | 7.227646  | -0.755733 | -3.181622 | H  | -3.468456 | 3.537452  | -2.924771 |
| H                       | 7.592465  | -2.045377 | -1.080919 | H  | 5.045368  | -0.944158 | 2.288077  |
| H                       | 5.888069  | -1.934555 | 0.734378  | H  | -0.286346 | -3.255576 | 0.480513  |
| H                       | 3.860507  | -0.559938 | 0.460280  | H  | -0.418148 | -4.311249 | -0.945755 |
| <b>Doublet TS1, gas</b> |           |           |           | H  | 1.082980  | -4.302216 | 0.031210  |
| C                       | -1.761687 | 2.857357  | -1.806679 | H  | 2.448284  | -3.790880 | -2.059055 |
| C                       | -0.989492 | 1.744625  | -1.446193 | H  | 0.969626  | -3.734881 | -3.073399 |
| C                       | -1.332745 | 0.449480  | -1.926660 | H  | 2.079426  | -2.348556 | -3.032899 |
| C                       | -2.445727 | 0.283658  | -2.762863 | H  | -2.681831 | -0.706833 | -3.129296 |
| C                       | -3.206751 | 1.403631  | -3.113624 | H  | -4.069642 | 1.277649  | -3.764054 |
| C                       | -2.868654 | 2.675260  | -2.641812 | H  | 5.429325  | -1.951028 | 0.866819  |
| N                       | 0.147670  | 1.718974  | -0.629361 | H  | 4.344745  | -2.590672 | 2.107574  |
| C                       | 0.839039  | 2.793839  | -0.141568 | H  | -2.323479 | 1.705880  | 0.874363  |
|                         |           |           |           | H  | -1.905197 | 1.624717  | 2.643056  |
|                         |           |           |           | H  | -3.023735 | -0.033204 | 4.106593  |

|                         |           |           |           |                                  |           |           |           |
|-------------------------|-----------|-----------|-----------|----------------------------------|-----------|-----------|-----------|
| H                       | -4.866763 | -1.648147 | 4.466497  | H                                | -4.384902 | -1.982951 | -2.620389 |
| H                       | -6.237290 | -2.425959 | 2.539033  | H                                | 0.538850  | -3.167672 | 0.227010  |
| H                       | -5.743389 | -1.575977 | 0.251603  | H                                | 0.606816  | -3.950912 | 1.833446  |
| H                       | -3.901322 | 0.037727  | -0.106415 | H                                | -0.792575 | -4.247877 | 0.743288  |
| <b>Quartet TS1, gas</b> |           |           |           | H                                | -2.385558 | -3.521271 | 2.580868  |
| C                       | 1.380694  | 3.334801  | 1.507970  | H                                | -1.023924 | -3.138272 | 3.697087  |
| C                       | 0.737723  | 2.110311  | 1.265090  | H                                | -2.238517 | -1.893233 | 3.303307  |
| C                       | 1.094890  | 0.952118  | 2.021306  | H                                | 2.338082  | 0.148952  | 3.583671  |
| C                       | 2.087889  | 1.039926  | 3.010631  | H                                | 3.493994  | 2.334876  | 4.004425  |
| C                       | 2.718353  | 2.267498  | 3.237832  | H                                | -5.416552 | -1.770952 | -1.192319 |
| C                       | 2.368604  | 3.401766  | 2.495944  | H                                | -4.333427 | -3.198208 | -1.281496 |
| N                       | -0.279127 | 1.845130  | 0.343045  | H                                | 2.782273  | 1.508963  | -0.645768 |
| C                       | -0.969367 | 2.761986  | -0.411814 | H                                | 2.438269  | 1.643370  | -2.269044 |
| O                       | -0.709564 | 3.967166  | -0.492429 | H                                | 3.286191  | -0.095039 | -3.959745 |
| N                       | 0.336685  | -0.162953 | 1.664802  | H                                | 4.926672  | -1.885748 | -4.456465 |
| C                       | 0.290779  | -1.369946 | 2.308562  | H                                | 6.176968  | -2.996720 | -2.601201 |
| O                       | 1.006309  | -1.713271 | 3.256864  | H                                | 5.762130  | -2.291672 | -0.240041 |
| Fe                      | -0.725124 | 0.031812  | 0.109856  | H                                | 4.124146  | -0.500460 | 0.260643  |
| N                       | -1.553643 | -1.533423 | 0.697847  | <b>Doublet Intermediate, gas</b> |           |           |           |
| C                       | -2.623641 | -2.149147 | 0.100513  | C                                | 3.173106  | 1.501703  | -2.969441 |
| N                       | -3.344859 | -1.416042 | -0.881565 | C                                | 3.287726  | 0.120305  | -3.159555 |
| C                       | -4.438663 | -2.140409 | -1.536115 | C                                | 2.349555  | -0.757330 | -2.606575 |
| O                       | 0.367051  | -0.430583 | -1.146549 | C                                | 1.286428  | -0.234100 | -1.857129 |
| N                       | -2.240103 | 0.699190  | -0.766810 | C                                | 1.162561  | 1.173700  | -1.674980 |
| C                       | -2.154542 | 2.122607  | -1.175986 | C                                | 2.115327  | 2.038554  | -2.231353 |
| C                       | -3.410759 | 2.926295  | -0.781945 | N                                | 0.244639  | -0.936347 | -1.239833 |
| C                       | -3.267149 | -0.048819 | -1.265988 | Fe                               | -0.847037 | 0.074749  | -0.102257 |
| O                       | -4.139930 | 0.377821  | -2.043141 | N                                | -2.169098 | 1.309412  | 0.311893  |
| C                       | -1.859198 | 2.261756  | -2.683608 | C                                | -3.344978 | 1.038470  | 0.952411  |
| C                       | -0.795767 | -2.304813 | 1.719957  | N                                | -3.722628 | -0.322621 | 1.091853  |
| C                       | -0.062824 | -3.503747 | 1.084545  | C                                | -4.969081 | -0.556132 | 1.828345  |
| C                       | -1.677147 | -2.751124 | 2.902945  | N                                | 0.027560  | 1.511217  | -0.936041 |
| O                       | -2.983735 | -3.310451 | 0.361111  | C                                | -0.445609 | 2.763457  | -0.659247 |
| C                       | 2.621585  | 0.870346  | -1.518121 | O                                | 0.070839  | 3.826332  | -1.005283 |
| C                       | 3.588282  | -0.145903 | -1.811888 | C                                | -0.025050 | -2.273830 | -1.324889 |
| C                       | 3.835773  | -0.573163 | -3.145167 | O                                | 0.691915  | -3.121892 | -1.860974 |
| C                       | 4.754789  | -1.579461 | -3.421690 | C                                | -1.378377 | -2.645205 | -0.672782 |
| C                       | 5.458531  | -2.204288 | -2.382135 | C                                | -2.243520 | -3.264850 | -1.793849 |
| C                       | 5.224889  | -1.805714 | -1.057725 | N                                | -1.984277 | -1.403477 | -0.135976 |
| C                       | 4.309144  | -0.799160 | -0.773921 | C                                | -3.188627 | -1.493665 | 0.496852  |
| H                       | 1.432782  | 0.169052  | -1.279036 | O                                | -3.849798 | -2.536670 | 0.599621  |
| H                       | -0.981877 | 1.655405  | -2.952911 | C                                | -1.092200 | -3.680031 | 0.436895  |
| H                       | -1.648796 | 3.316206  | -2.914108 | C                                | -1.762578 | 2.729154  | 0.155114  |
| H                       | -2.724246 | 1.916727  | -3.263163 | C                                | -1.470590 | 3.392346  | 1.519615  |
| H                       | -4.270011 | 2.595585  | -1.375054 | C                                | -2.798251 | 3.544638  | -0.648701 |
| H                       | -3.214338 | 3.993810  | -0.953612 | O                                | 0.038893  | -0.073712 | 1.425722  |
| H                       | -3.634516 | 2.780753  | 0.285533  | O                                | -4.095076 | 1.906405  | 1.418637  |
| H                       | 1.092271  | 4.205842  | 0.923040  | H                                | 0.924619  | -0.429389 | 1.217921  |
| H                       | 2.872116  | 4.353284  | 2.682550  |                                  |           |           |           |

|   |           |           |           |
|---|-----------|-----------|-----------|
| H | -0.512810 | -3.216063 | 1.243450  |
| H | -0.509961 | -4.506674 | 0.016882  |
| H | -2.030770 | -4.053513 | 0.849150  |
| H | -3.190011 | -3.614985 | -1.380932 |
| H | -1.697509 | -4.095605 | -2.251755 |
| H | -2.448880 | -2.515557 | -2.567575 |
| H | 2.414183  | -1.827971 | -2.751613 |
| H | 4.111429  | -0.281223 | -3.745772 |
| H | -4.857044 | -1.448170 | 2.445455  |
| H | -0.749560 | 2.789566  | 2.082626  |
| H | -1.043124 | 4.386740  | 1.353053  |
| H | -2.393081 | 3.475538  | 2.097125  |
| H | -3.719391 | 3.654892  | -0.076589 |
| H | -2.372379 | 4.525897  | -0.878683 |
| H | -3.026186 | 3.037184  | -1.593940 |
| H | 2.001535  | 3.104694  | -2.085852 |
| H | 3.911073  | 2.171640  | -3.405364 |
| H | -5.809547 | -0.722915 | 1.143704  |
| H | -5.169096 | 0.323468  | 2.434717  |
| C | 2.759740  | -2.117669 | 1.231872  |
| H | 2.530994  | -2.274554 | 0.183017  |
| C | 3.708676  | -1.163888 | 1.651627  |
| H | 2.260103  | -2.757402 | 1.953107  |
| C | 4.043303  | -1.007560 | 3.030760  |
| C | 4.982215  | -0.073190 | 3.438931  |
| C | 5.624375  | 0.746138  | 2.498206  |
| C | 5.308542  | 0.616554  | 1.137507  |
| C | 4.373479  | -0.315668 | 0.714374  |
| H | 3.543077  | -1.636585 | 3.763372  |
| H | 5.218120  | 0.027760  | 4.495801  |
| H | 6.355500  | 1.481852  | 2.822917  |
| H | 5.793091  | 1.257090  | 0.404916  |
| H | 4.123985  | -0.401576 | -0.339570 |

#### Quartet Intermediate, gas

|    |           |           |           |
|----|-----------|-----------|-----------|
| C  | 2.722007  | 2.278252  | 3.231280  |
| C  | 2.372461  | 3.410703  | 2.486288  |
| C  | 1.384984  | 3.341358  | 1.497642  |
| C  | 0.742461  | 2.116150  | 1.257472  |
| C  | 1.098544  | 0.960082  | 2.018238  |
| C  | 2.092197  | 1.049505  | 3.006862  |
| N  | -0.274329 | 1.848848  | 0.335204  |
| Fe | -0.732538 | 0.035795  | 0.118170  |
| N  | -1.554155 | -1.533963 | 0.702471  |
| C  | -2.622260 | -2.150671 | 0.106802  |
| N  | -3.343759 | -1.417479 | -0.877180 |
| C  | -4.438221 | -2.143117 | -1.529289 |
| N  | 0.339602  | -0.156461 | 1.664636  |
| C  | 0.294103  | -1.362436 | 2.311726  |

|   |           |           |           |
|---|-----------|-----------|-----------|
| O | 1.009097  | -1.703966 | 3.261145  |
| C | -0.965902 | 2.763707  | -0.419220 |
| O | -0.709159 | 3.969902  | -0.503209 |
| C | -2.153167 | 2.121784  | -1.180439 |
| C | -3.409057 | 2.926477  | -0.788460 |
| N | -2.241720 | 0.699351  | -0.766895 |
| C | -3.267434 | -0.051116 | -1.265170 |
| O | -4.140062 | 0.373702  | -2.043670 |
| C | -1.858651 | 2.256335  | -2.688684 |
| C | -0.793484 | -2.300114 | 1.725530  |
| C | -0.060491 | -3.501208 | 1.093686  |
| C | -1.674380 | -2.742620 | 2.910639  |
| O | 0.354703  | -0.464537 | -1.167408 |
| O | -2.984451 | -3.311087 | 0.369620  |
| H | 1.243691  | 0.032771  | -1.212973 |
| H | -0.981365 | 1.648909  | -2.956487 |
| H | -1.648746 | 3.310023  | -2.922907 |
| H | -2.723865 | 1.908376  | -3.266505 |
| H | -4.268242 | 2.594665  | -1.380977 |
| H | -3.211859 | 3.993518  | -0.961367 |
| H | -3.633527 | 2.782503  | 0.279189  |
| H | 1.095070  | 4.211136  | 0.911665  |
| H | 2.874230  | 4.363108  | 2.672858  |
| H | -4.386009 | -1.987241 | -2.613954 |
| H | 0.540357  | -3.166634 | 0.235329  |
| H | 0.609180  | -3.946490 | 1.843629  |
| H | -0.791253 | -4.245388 | 0.755312  |
| H | -2.382644 | -3.513647 | 2.591153  |
| H | -1.020532 | -3.126545 | 3.705917  |
| H | -2.235308 | -1.883146 | 3.307747  |
| H | 2.341114  | 0.160494  | 3.583267  |
| H | 3.496286  | 2.348830  | 3.999025  |
| H | -5.415979 | -1.773986 | -1.184876 |
| H | -4.332189 | -3.200388 | -1.272902 |
| C | 2.683720  | 0.905124  | -1.530960 |
| H | 2.643285  | 1.345357  | -0.532915 |
| C | 3.598628  | -0.140027 | -1.814526 |
| H | 2.249295  | 1.485075  | -2.346885 |
| C | 3.836938  | -0.580275 | -3.149364 |
| C | 4.752827  | -1.587957 | -3.420786 |
| C | 5.457991  | -2.208598 | -2.378104 |
| C | 5.224563  | -1.807400 | -1.053272 |
| C | 4.313192  | -0.799037 | -0.770960 |
| H | 3.286906  | -0.103559 | -3.964195 |
| H | 4.922388  | -1.901207 | -4.453720 |
| H | 6.175851  | -3.002028 | -2.594912 |
| H | 5.760387  | -2.293937 | -0.235114 |
| H | 4.129559  | -0.494812 | 0.262117  |

#### Doublet TS2, gas

|    |           |           |           |                         |           |           |           |
|----|-----------|-----------|-----------|-------------------------|-----------|-----------|-----------|
| C  | 0.539152  | 2.245535  | 1.166426  | H                       | 1.123865  | -1.473215 | 4.179058  |
| C  | -0.506994 | 2.765943  | 0.345993  | H                       | -0.541462 | -1.035115 | 3.735066  |
| C  | -0.602355 | 4.146412  | 0.124221  | H                       | 2.264323  | 2.701374  | 2.359082  |
| C  | 0.338909  | 4.998400  | 0.708728  | H                       | 2.094975  | 5.163973  | 1.952542  |
| C  | 1.368649  | 4.488377  | 1.505680  | H                       | -3.346388 | -4.429197 | 0.639596  |
| C  | 1.478665  | 3.114606  | 1.739591  | H                       | -1.785453 | -4.890989 | -0.060245 |
| N  | -1.346747 | 1.761403  | -0.143724 | H                       | 1.981426  | 1.667701  | -1.068986 |
| C  | -2.518352 | 1.911226  | -0.830355 | H                       | 1.694067  | 1.214585  | -2.832868 |
| O  | -3.014087 | 2.976555  | -1.202797 | H                       | 3.139783  | -0.491240 | -3.924569 |
| N  | 0.461169  | 0.857562  | 1.307470  | H                       | 5.103124  | -1.995680 | -3.859250 |
| C  | 1.279362  | 0.038355  | 2.021915  | H                       | 6.398450  | -2.272103 | -1.749614 |
| O  | 2.298874  | 0.371547  | 2.637350  | H                       | 5.699916  | -1.037406 | 0.299166  |
| Fe | -0.735530 | 0.013403  | 0.119144  | H                       | 3.734999  | 0.453222  | 0.250425  |
| N  | -0.350634 | -1.543281 | 1.071064  |                         |           |           |           |
| C  | -1.004740 | -2.736370 | 0.967856  | <b>Quartet TS2, gas</b> |           |           |           |
| N  | -2.075759 | -2.827093 | 0.037462  | C                       | 2.125551  | -2.090559 | 0.451534  |
| C  | -2.608735 | -4.182427 | -0.134662 | C                       | 2.610356  | -1.495015 | -0.751446 |
| O  | 0.390860  | -0.117085 | -1.317394 | C                       | 3.518481  | -2.190135 | -1.562591 |
| C  | 2.171142  | 0.986474  | -1.887405 | C                       | 3.933420  | -3.466871 | -1.178477 |
| C  | 3.295241  | 0.114513  | -1.849710 | C                       | 3.455524  | -4.052316 | -0.000025 |
| C  | 4.045432  | -0.064138 | -0.653767 | C                       | 2.553025  | -3.373847 | 0.821425  |
| C  | 5.145307  | -0.911630 | -0.627222 | N                       | 2.089600  | -0.214449 | -0.952945 |
| C  | 5.537214  | -1.609578 | -1.777998 | C                       | 2.463944  | 0.700673  | -1.898778 |
| C  | 4.806598  | -1.453874 | -2.963986 | O                       | 3.281126  | 0.519532  | -2.802327 |
| C  | 3.704382  | -0.610547 | -3.002474 | N                       | 1.253472  | -1.247664 | 1.142501  |
| N  | -2.421431 | -0.520195 | -0.465908 | C                       | 0.686528  | -1.452425 | 2.368910  |
| C  | -3.219951 | 0.555156  | -1.106334 | O                       | 0.816894  | -2.453263 | 3.075726  |
| C  | -4.635771 | 0.661642  | -0.499754 | Fe                      | 0.679508  | 0.263142  | 0.183950  |
| C  | -2.871645 | -1.803752 | -0.551939 | N                       | -0.102023 | 0.807107  | 1.791420  |
| O  | -3.920652 | -2.145807 | -1.115531 | C                       | -0.734306 | 1.993415  | 2.011651  |
| C  | -3.287974 | 0.380371  | -2.639330 | N                       | -0.692726 | 2.969364  | 0.977287  |
| C  | 0.772141  | -1.429175 | 2.038546  | C                       | -1.487590 | 4.169608  | 1.257112  |
| C  | 1.949345  | -2.354937 | 1.677034  | O                       | -0.795129 | -0.360677 | -0.720364 |
| C  | 0.301832  | -1.691244 | 3.489504  | C                       | -2.063530 | -1.857969 | -2.079905 |
| O  | -0.703156 | -3.758408 | 1.600427  | C                       | -3.433796 | -1.679907 | -1.784230 |
| H  | 0.765802  | -1.015322 | -1.276027 | C                       | -4.065906 | -2.411660 | -0.737369 |
| H  | -2.276105 | 0.289513  | -3.051173 | C                       | -5.411819 | -2.234163 | -0.452296 |
| H  | -3.767750 | 1.258799  | -3.083368 | C                       | -6.182251 | -1.325512 | -1.192557 |
| H  | -3.853767 | -0.519816 | -2.886597 | C                       | -5.582426 | -0.591578 | -2.226094 |
| H  | -5.220287 | -0.224212 | -0.749630 | C                       | -4.237147 | -0.760724 | -2.519302 |
| H  | -5.121987 | 1.561758  | -0.888066 | N                       | 0.897424  | 1.990214  | -0.507945 |
| H  | -4.570651 | 0.747187  | 0.591653  | C                       | 1.750572  | 2.065978  | -1.718783 |
| H  | -1.409738 | 4.521963  | -0.490965 | C                       | 2.863506  | 3.126087  | -1.569008 |
| H  | 0.265797  | 6.070191  | 0.536967  | C                       | 0.180017  | 3.087281  | -0.144825 |
| H  | -3.096561 | -4.238371 | -1.105839 | O                       | 0.214768  | 4.177897  | -0.733136 |
| H  | 2.280635  | -2.174608 | 0.647534  | C                       | 0.918247  | 2.317856  | -2.995196 |
| H  | 2.792177  | -2.142437 | 2.341914  | C                       | -0.165721 | -0.243311 | 2.837978  |
| H  | 1.646038  | -3.398507 | 1.773631  | C                       | -1.608722 | -0.749139 | 3.050750  |
| H  | -0.013474 | -2.729737 | 3.598474  | C                       | 0.451479  | 0.231283  | 4.172331  |

|   |           |           |           |
|---|-----------|-----------|-----------|
| O | -1.370522 | 2.270416  | 3.038627  |
| H | -1.550462 | 0.165403  | -0.402600 |
| H | 0.124753  | 1.566020  | -3.078268 |
| H | 1.567245  | 2.238536  | -3.873490 |
| H | 0.464768  | 3.309841  | -2.953425 |
| H | 2.426899  | 4.124680  | -1.534028 |
| H | 3.554662  | 3.041121  | -2.413324 |
| H | 3.424497  | 2.951897  | -0.643001 |
| H | 3.882773  | -1.717253 | -2.465239 |
| H | 4.637192  | -4.009356 | -1.806232 |
| H | -1.700094 | 4.667022  | 0.313083  |
| H | -2.036826 | -1.079560 | 2.096660  |
| H | -1.598849 | -1.601371 | 3.737869  |
| H | -2.226801 | 0.053125  | 3.458429  |
| H | -0.159397 | 1.021397  | 4.609776  |
| H | 0.518228  | -0.621346 | 4.855168  |
| H | 1.463068  | 0.618606  | 4.001795  |
| H | 2.179718  | -3.805630 | 1.740957  |
| H | 3.789428  | -5.048007 | 0.284300  |
| H | -0.947848 | 4.870288  | 1.906952  |
| H | -2.402737 | 3.870085  | 1.765738  |
| H | -1.473072 | -2.607557 | -1.569976 |
| H | -1.601456 | -1.346991 | -2.915025 |
| H | -3.774965 | -0.185634 | -3.318061 |
| H | -6.173721 | 0.117708  | -2.800350 |
| H | -7.235437 | -1.187168 | -0.963198 |
| H | -5.870142 | -2.801436 | 0.354143  |
| H | -3.470565 | -3.111651 | -0.156646 |

**Doublet Product, gas**

|    |           |           |           |
|----|-----------|-----------|-----------|
| C  | 0.878762  | 2.723188  | -0.452310 |
| C  | 0.221637  | 2.667069  | 0.817159  |
| C  | -0.254406 | 3.845130  | 1.407464  |
| C  | -0.077455 | 5.065445  | 0.747479  |
| C  | 0.570893  | 5.120706  | -0.489291 |
| C  | 1.054128  | 3.956039  | -1.093500 |
| N  | 0.151739  | 1.365639  | 1.343274  |
| C  | -0.225192 | 0.980054  | 2.595656  |
| O  | -0.681558 | 1.707166  | 3.482990  |
| N  | 1.297839  | 1.463768  | -0.908919 |
| C  | 2.168276  | 1.179153  | -1.922775 |
| O  | 2.660574  | 1.984458  | -2.716183 |
| Fe | 0.734611  | 0.026506  | 0.152083  |
| N  | 1.865263  | -1.032031 | -0.860563 |
| C  | 2.006242  | -2.384214 | -0.720615 |
| N  | 1.328275  | -3.022885 | 0.360078  |
| C  | 1.486420  | -4.481362 | 0.359275  |
| O  | -1.160175 | -0.525706 | -0.491858 |
| C  | -2.165617 | 0.472824  | -0.768151 |

|   |           |           |           |
|---|-----------|-----------|-----------|
| C | -3.488160 | -0.158387 | -1.136619 |
| C | -3.541922 | -1.221683 | -2.049532 |
| C | -4.766830 | -1.782746 | -2.408116 |
| C | -5.954767 | -1.285400 | -1.863948 |
| C | -5.909336 | -0.228809 | -0.953674 |
| C | -4.680821 | 0.326842  | -0.588439 |
| N | 0.413944  | -1.192576 | 1.586187  |
| C | 0.011392  | -0.541545 | 2.861039  |
| C | 1.127132  | -0.620472 | 3.927984  |
| C | 0.801076  | -2.491208 | 1.588674  |
| O | 0.688631  | -3.269589 | 2.548874  |
| C | -1.296857 | -1.138054 | 3.417908  |
| C | 2.522029  | -0.339279 | -1.999693 |
| C | 2.007848  | -0.854967 | -3.361749 |
| C | 4.058482  | -0.450806 | -1.924834 |
| O | 2.673553  | -3.101190 | -1.480297 |
| H | -1.382755 | -1.039463 | 0.312913  |
| H | -2.098564 | -1.080641 | 2.667550  |
| H | -1.618849 | -0.567152 | 4.294133  |
| H | -1.141989 | -2.186215 | 3.679719  |
| H | 1.306251  | -1.661654 | 4.202600  |
| H | 0.831847  | -0.044980 | 4.811140  |
| H | 2.056401  | -0.194125 | 3.531334  |
| H | -0.735959 | 3.784819  | 2.375331  |
| H | -0.446754 | 5.978862  | 1.209383  |
| H | 0.737213  | -4.904720 | 1.025016  |
| H | 0.913898  | -0.785458 | -3.406706 |
| H | 2.425355  | -0.236273 | -4.162811 |
| H | 2.299288  | -1.897338 | -3.500710 |
| H | 4.363966  | -1.489849 | -2.059161 |
| H | 4.505136  | 0.179442  | -2.699938 |
| H | 4.413942  | -0.101256 | -0.948066 |
| H | 1.572230  | 3.978840  | -2.044008 |
| H | 0.704746  | 6.076691  | -0.991407 |
| H | 2.479806  | -4.785011 | 0.712438  |
| H | 1.364119  | -4.848309 | -0.659859 |
| H | -1.749744 | 1.047802  | -1.600187 |
| H | -2.269651 | 1.148561  | 0.086425  |
| H | -4.646502 | 1.143745  | 0.128945  |
| H | -6.827528 | 0.158288  | -0.519052 |
| H | -6.909213 | -1.723646 | -2.144931 |
| H | -4.795252 | -2.609128 | -3.113867 |
| H | -2.616662 | -1.610619 | -2.465355 |

**Quartet Product, gas**

|   |           |          |           |
|---|-----------|----------|-----------|
| C | 0.450993  | 2.828488 | -0.329818 |
| C | -0.126348 | 2.618153 | 0.959689  |
| C | -0.753687 | 3.675951 | 1.625706  |
| C | -0.809469 | 4.935433 | 1.016253  |





|   |           |           |           |
|---|-----------|-----------|-----------|
| H | 2.240164  | -2.839485 | 1.343675  |
| H | 0.867793  | -3.825834 | 0.772110  |
| H | -0.399104 | -3.341067 | 2.958318  |
| H | 0.947835  | -2.328115 | 3.550475  |
| H | -0.694001 | -1.658870 | 3.456165  |
| H | 2.543117  | 1.922564  | 2.088331  |
| H | 2.596571  | 4.415501  | 2.150803  |
| H | -4.088994 | -4.198722 | 0.146334  |
| H | -2.745399 | -4.591865 | -0.943059 |
| C | 3.455975  | 0.992161  | -1.774768 |
| H | 3.210075  | 1.680510  | -0.957732 |
| C | 4.678521  | 0.163632  | -1.449216 |
| H | 3.605624  | 1.583283  | -2.684225 |
| C | 5.711316  | 0.000985  | -2.382967 |
| C | 6.835626  | -0.775906 | -2.087704 |
| C | 6.946101  | -1.405313 | -0.846240 |
| C | 5.924029  | -1.249545 | 0.095510  |
| C | 4.802878  | -0.472559 | -0.202950 |
| H | 5.635140  | 0.489586  | -3.351970 |
| H | 7.624534  | -0.885785 | -2.827610 |
| H | 7.819527  | -2.008390 | -0.612623 |
| H | 6.001675  | -1.732020 | 1.066769  |
| H | 4.016957  | -0.356210 | 0.540625  |

**Doublet TS1, CPCM CH<sub>3</sub>CN**

|    |           |           |           |
|----|-----------|-----------|-----------|
| C  | -1.831926 | 2.783506  | -1.848234 |
| C  | -1.024962 | 1.695249  | -1.489663 |
| C  | -1.328223 | 0.392096  | -1.971843 |
| C  | -2.435161 | 0.194050  | -2.808308 |
| C  | -3.230874 | 1.289471  | -3.159249 |
| C  | -2.932172 | 2.570329  | -2.684901 |
| N  | 0.113641  | 1.703849  | -0.668009 |
| C  | 0.788199  | 2.794522  | -0.200436 |
| O  | 0.457020  | 3.971234  | -0.370586 |
| N  | -0.411472 | -0.563036 | -1.515601 |
| C  | -0.275486 | -1.848825 | -1.938563 |
| O  | -1.003442 | -2.426696 | -2.752740 |
| Fe | 0.726352  | 0.019796  | -0.130003 |
| N  | 1.655665  | -1.567128 | -0.457477 |
| C  | 2.787138  | -1.963348 | 0.192533  |
| N  | 3.426472  | -1.033984 | 1.049011  |
| C  | 4.559660  | -1.578095 | 1.809919  |
| O  | -0.174588 | -0.293540 | 1.272876  |
| N  | 2.231851  | 0.948775  | 0.493643  |
| C  | 2.066498  | 2.419841  | 0.580489  |
| C  | 3.234185  | 3.172678  | -0.094104 |
| C  | 3.308478  | 0.379524  | 1.096862  |
| O  | 4.193118  | 1.009704  | 1.698125  |
| C  | 1.867579  | 2.896422  | 2.036901  |

|   |           |           |           |
|---|-----------|-----------|-----------|
| C | 0.942793  | -2.557873 | -1.304097 |
| C | 0.401152  | -3.741822 | -0.473492 |
| C | 1.820529  | -3.054704 | -2.473718 |
| O | 3.281743  | -3.097577 | 0.098941  |
| C | -2.264405 | 1.096497  | 1.795996  |
| C | -3.340733 | 0.129924  | 2.025757  |
| C | -3.553467 | -0.429884 | 3.305393  |
| C | -4.562225 | -1.365472 | 3.515317  |
| C | -5.377248 | -1.770088 | 2.450860  |
| C | -5.175621 | -1.231450 | 1.173851  |
| C | -4.167678 | -0.295680 | 0.961254  |
| H | -1.228104 | 0.437128  | 1.482755  |
| H | 1.043311  | 2.348414  | 2.507262  |
| H | 1.622960  | 3.963316  | 2.042613  |
| H | 2.778131  | 2.728161  | 2.613829  |
| H | 4.155268  | 3.021448  | 0.468470  |
| H | 2.997482  | 4.239609  | -0.137815 |
| H | 3.380372  | 2.809097  | -1.118167 |
| H | -1.586748 | 3.770509  | -1.480198 |
| H | -3.558165 | 3.413207  | -2.965375 |
| H | 4.687237  | -0.985539 | 2.713420  |
| H | -0.209342 | -3.375913 | 0.360048  |
| H | -0.226086 | -4.374373 | -1.109426 |
| H | 1.227389  | -4.331488 | -0.074100 |
| H | 2.649843  | -3.653606 | -2.098201 |
| H | 1.206761  | -3.654552 | -3.151715 |
| H | 2.223526  | -2.203344 | -3.035114 |
| H | -2.651017 | -0.800315 | -3.175620 |
| H | -4.089304 | 1.137501  | -3.808165 |
| H | 5.491496  | -1.539854 | 1.232768  |
| H | 4.345489  | -2.615621 | 2.056597  |
| H | -2.396152 | 1.744210  | 0.927553  |
| H | -1.924590 | 1.638654  | 2.681643  |
| H | -2.922929 | -0.114681 | 4.132987  |
| H | -4.718176 | -1.780034 | 4.507291  |
| H | -6.164633 | -2.500177 | 2.615385  |
| H | -5.808411 | -1.542213 | 0.347237  |
| H | -4.010829 | 0.120207  | -0.030926 |

**Quartet Intermediate, CPCM CH<sub>3</sub>CN**

|    |           |           |           |
|----|-----------|-----------|-----------|
| C  | 3.367530  | 0.394816  | -3.147479 |
| C  | 3.310412  | -1.001450 | -3.065866 |
| C  | 2.265448  | -1.635060 | -2.387359 |
| C  | 1.268399  | -0.853473 | -1.787134 |
| C  | 1.323465  | 0.566854  | -1.874565 |
| C  | 2.380508  | 1.186870  | -2.555875 |
| N  | 0.145226  | -1.293124 | -1.071113 |
| Fe | -0.776297 | 0.037548  | -0.136256 |
| N  | -1.931401 | 1.487151  | 0.039800  |

|   |           |           |           |
|---|-----------|-----------|-----------|
| C | -3.110035 | 1.480254  | 0.725367  |
| N | -3.603334 | 0.235340  | 1.189452  |
| C | -4.813189 | 0.332151  | 2.018163  |
| N | 0.239636  | 1.175515  | -1.231886 |
| C | -0.093356 | 2.498679  | -1.228953 |
| O | 0.531418  | 3.403583  | -1.789022 |
| C | -0.332526 | -2.570804 | -0.976749 |
| O | 0.213303  | -3.578009 | -1.433391 |
| C | -1.688885 | -2.648998 | -0.239407 |
| C | -2.684218 | -3.303624 | -1.224116 |
| N | -2.096357 | -1.265723 | 0.113138  |
| C | -3.268400 | -1.082587 | 0.780870  |
| O | -4.057832 | -1.994323 | 1.072492  |
| C | -1.482316 | -3.534493 | 1.009075  |
| C | -1.397993 | 2.784371  | -0.448380 |
| C | -1.037366 | 3.738247  | 0.711647  |
| C | -2.365871 | 3.462886  | -1.443398 |
| O | 0.108366  | 0.075796  | 1.405699  |
| O | -3.771195 | 2.496555  | 0.986955  |
| H | 0.868008  | -0.537684 | 1.333870  |
| H | -0.779007 | -3.060665 | 1.703250  |
| H | -1.067863 | -4.500419 | 0.704297  |
| H | -2.432578 | -3.689890 | 1.521384  |
| H | -3.643745 | -3.468349 | -0.734151 |
| H | -2.275952 | -4.258096 | -1.568807 |
| H | -2.837503 | -2.657199 | -2.096194 |
| H | 2.206964  | -2.713311 | -2.323656 |
| H | 4.083828  | -1.604180 | -3.534196 |
| H | -4.885820 | -0.564773 | 2.628896  |
| H | -0.353396 | 3.247709  | 1.413243  |
| H | -0.540353 | 4.626492  | 0.309598  |
| H | -1.939132 | 4.036537  | 1.247858  |
| H | -3.275503 | 3.776820  | -0.931636 |
| H | -1.872989 | 4.332206  | -1.887994 |
| H | -2.633258 | 2.768123  | -2.248400 |
| H | 2.409778  | 2.266312  | -2.618993 |
| H | 4.186506  | 0.873114  | -3.677974 |
| H | -5.718902 | 0.414598  | 1.405381  |
| H | -4.736892 | 1.218882  | 2.644246  |
| C | 2.652930  | -1.973885 | 1.730910  |
| H | 2.535004  | -2.376815 | 0.729874  |
| C | 3.516652  | -0.887815 | 1.982158  |
| H | 2.146092  | -2.484092 | 2.544457  |
| C | 3.716075  | -0.390838 | 3.306554  |
| C | 4.564395  | 0.679401  | 3.547765  |
| C | 5.246842  | 1.298721  | 2.488302  |
| C | 5.068704  | 0.828450  | 1.177414  |
| C | 4.223695  | -0.241532 | 0.921784  |
| H | 3.189712  | -0.867763 | 4.129572  |
| H | 4.701584  | 1.040223  | 4.563643  |

|   |          |           |           |
|---|----------|-----------|-----------|
| H | 5.909616 | 2.137035  | 2.682194  |
| H | 5.596433 | 1.305156  | 0.355620  |
| H | 4.088825 | -0.601979 | -0.094698 |

### Doublet Reactant, CPCM water

|    |           |           |           |
|----|-----------|-----------|-----------|
| C  | 1.747963  | 3.900236  | 1.712322  |
| C  | 0.685564  | 4.640937  | 1.180290  |
| C  | -0.414245 | 4.003431  | 0.604320  |
| C  | -0.436932 | 2.601119  | 0.550594  |
| C  | 0.641045  | 1.850224  | 1.088951  |
| C  | 1.734049  | 2.505033  | 1.675750  |
| N  | -1.450317 | 1.778364  | 0.037079  |
| Fe | -1.026977 | -0.014705 | -0.142846 |
| N  | -0.924465 | -1.619864 | 0.753053  |
| C  | -1.720773 | -2.711842 | 0.481862  |
| N  | -2.816239 | -2.573148 | -0.380621 |
| C  | -3.495127 | -3.836570 | -0.702433 |
| N  | 0.409204  | 0.480529  | 0.992654  |
| C  | 1.044882  | -0.505911 | 1.672135  |
| O  | 2.067506  | -0.378882 | 2.354433  |
| C  | -2.668777 | 2.193991  | -0.448898 |
| O  | -3.012852 | 3.369810  | -0.552455 |
| C  | -3.575377 | 1.035497  | -0.880499 |
| C  | -4.898277 | 1.192697  | -0.097460 |
| N  | -2.868093 | -0.215028 | -0.539967 |
| C  | -3.499760 | -1.389619 | -0.765285 |
| O  | -4.623569 | -1.505933 | -1.277601 |
| C  | -3.808920 | 1.179712  | -2.401812 |
| C  | 0.322563  | -1.858066 | 1.537290  |
| C  | 1.285795  | -2.821695 | 0.810499  |
| C  | 0.016140  | -2.337211 | 2.972516  |
| O  | -0.307733 | -0.168447 | -1.552737 |
| O  | -1.481726 | -3.836030 | 0.941270  |
| H  | 2.572529  | 0.365626  | -1.936083 |
| H  | -2.863665 | 1.074620  | -2.946081 |
| H  | -4.226180 | 2.167934  | -2.618478 |
| H  | -4.500812 | 0.408407  | -2.742541 |
| H  | -5.624200 | 0.451446  | -0.430582 |
| H  | -5.296244 | 2.198219  | -0.261326 |
| H  | -4.722824 | 1.059853  | 0.976477  |
| H  | -1.240105 | 4.567354  | 0.195274  |
| H  | 0.713066  | 5.726604  | 1.210128  |
| H  | -4.149493 | -3.658973 | -1.551363 |
| H  | 1.474621  | -2.475741 | -0.212124 |
| H  | 2.238870  | -2.841943 | 1.347569  |
| H  | 0.867081  | -3.827509 | 0.773569  |
| H  | -0.403410 | -3.342296 | 2.958041  |
| H  | 0.943591  | -2.330888 | 3.552197  |
| H  | -0.697452 | -1.659970 | 3.455906  |

|   |           |           |           |
|---|-----------|-----------|-----------|
| H | 2.541533  | 1.920070  | 2.094320  |
| H | 2.596401  | 4.412751  | 2.157308  |
| H | -4.092209 | -4.196572 | 0.142892  |
| H | -2.747206 | -4.591047 | -0.944360 |
| C | 3.457238  | 0.996178  | -1.776419 |
| H | 3.211072  | 1.683369  | -0.958481 |
| C | 4.678249  | 0.165413  | -1.450681 |
| H | 3.608928  | 1.588759  | -2.684574 |
| C | 5.710816  | 0.000897  | -2.384380 |
| C | 6.833584  | -0.778209 | -2.089059 |
| C | 6.942727  | -1.407976 | -0.847634 |
| C | 5.920895  | -1.250337 | 0.094073  |
| C | 4.801278  | -0.471128 | -0.204470 |
| H | 5.635742  | 0.489789  | -3.353311 |
| H | 7.622373  | -0.889500 | -2.828858 |
| H | 7.814985  | -2.012710 | -0.614001 |
| H | 5.997613  | -1.733010 | 1.065303  |
| H | 4.015567  | -0.353217 | 0.539097  |

**Doublet TS1, CPCM water**

|    |           |           |           |
|----|-----------|-----------|-----------|
| C  | 4.159640  | -0.122754 | 0.965429  |
| C  | 3.296885  | -0.537443 | 2.005681  |
| C  | 3.539169  | -0.054956 | 3.311651  |
| C  | 4.609474  | 0.796033  | 3.569777  |
| C  | 5.458620  | 1.191533  | 2.528559  |
| C  | 5.229367  | 0.728363  | 1.226914  |
| C  | 2.157120  | -1.414423 | 1.728806  |
| O  | 0.130490  | 0.111816  | 1.342388  |
| Fe | -0.738080 | 0.022581  | -0.110943 |
| N  | -2.129157 | -1.191242 | 0.241156  |
| C  | -3.284523 | -0.899611 | 0.892889  |
| O  | -4.111903 | -1.744085 | 1.272334  |
| N  | 0.078168  | -1.417292 | -0.979116 |
| C  | -0.459050 | -2.655849 | -0.780157 |
| C  | -1.803629 | -2.613592 | -0.022233 |
| C  | -1.626989 | -3.427253 | 1.278470  |
| C  | 1.220906  | -1.093190 | -1.728961 |
| C  | 2.163975  | -1.972484 | -2.277757 |
| C  | 3.239017  | -1.451686 | -3.005760 |
| C  | 3.376848  | -0.072041 | -3.187066 |
| C  | 2.444228  | 0.816667  | -2.643134 |
| C  | 1.362755  | 0.310176  | -1.910356 |
| N  | 0.327546  | 1.026360  | -1.297074 |
| C  | 0.039077  | 2.348229  | -1.434215 |
| C  | -1.256615 | 2.753255  | -0.694885 |
| C  | -2.186787 | 3.390194  | -1.750201 |
| O  | 0.031289  | -3.720976 | -1.166169 |
| O  | 0.694297  | 3.172335  | -2.081209 |
| N  | -1.846903 | 1.523290  | -0.106676 |

|   |           |           |           |
|---|-----------|-----------|-----------|
| C | -3.021437 | 1.630847  | 0.579272  |
| O | -3.642010 | 2.694238  | 0.733858  |
| N | -3.558294 | 0.465013  | 1.175517  |
| C | -4.756416 | 0.697811  | 1.993480  |
| C | -2.847380 | -3.276169 | -0.950067 |
| C | -0.861482 | 3.780691  | 0.388563  |
| H | 1.161434  | -0.671304 | 1.470417  |
| H | -0.903495 | -2.938641 | 1.940797  |
| H | -1.252239 | -4.425991 | 1.034320  |
| H | -2.580029 | -3.513106 | 1.801860  |
| H | -3.809534 | -3.345890 | -0.442544 |
| H | -2.502404 | -4.276494 | -1.227517 |
| H | -2.971407 | -2.686215 | -1.865860 |
| H | 2.042024  | -3.037975 | -2.137846 |
| H | 3.970624  | -2.131806 | -3.433696 |
| H | -4.869083 | -0.135132 | 2.683486  |
| H | -0.210911 | 3.317264  | 1.139236  |
| H | -0.314880 | 4.606314  | -0.077859 |
| H | -1.752430 | 4.166951  | 0.885305  |
| H | -3.080451 | 3.793609  | -1.274618 |
| H | -1.648564 | 4.190488  | -2.266149 |
| H | -2.487440 | 2.641977  | -2.493201 |
| H | 2.536512  | 1.885549  | -2.782033 |
| H | 4.216411  | 0.319298  | -3.755457 |
| H | -5.661169 | 0.769627  | 1.377846  |
| H | -4.632163 | 1.632966  | 2.536149  |
| H | 2.242332  | -2.020382 | 0.825692  |
| H | 1.785623  | -1.982144 | 2.585377  |
| H | 2.881975  | -0.363746 | 4.120742  |
| H | 4.787226  | 1.151393  | 4.580842  |
| H | 6.294323  | 1.855489  | 2.730604  |
| H | 5.889322  | 1.031203  | 0.418807  |
| H | 3.984993  | -0.484051 | -0.044624 |

**Quartet Intermediate, CPCM water**

|    |           |           |           |
|----|-----------|-----------|-----------|
| C  | 3.368440  | 0.390539  | -3.148562 |
| C  | 3.310962  | -1.005646 | -3.065454 |
| C  | 2.265728  | -1.638272 | -2.386498 |
| C  | 1.268711  | -0.855817 | -1.787342 |
| C  | 1.324186  | 0.564394  | -1.876210 |
| C  | 2.381524  | 1.183446  | -2.557963 |
| N  | 0.145334  | -1.294421 | -1.070898 |
| Fe | -0.775094 | 0.037349  | -0.136730 |
| N  | -1.929844 | 1.487590  | 0.038485  |
| C  | -3.108026 | 1.481629  | 0.724751  |
| N  | -3.600775 | 0.237393  | 1.191254  |
| C  | -4.809732 | 0.335271  | 2.021260  |
| N  | 0.240453  | 1.173982  | -1.234093 |
| C  | -0.092530 | 2.497120  | -1.232808 |

|                                                         |           |           |           |    |           |           |           |
|---------------------------------------------------------|-----------|-----------|-----------|----|-----------|-----------|-----------|
| O                                                       | 0.532074  | 3.401235  | -1.794437 | C  | 0.742349  | 1.874595  | 1.163979  |
| C                                                       | -0.333656 | -2.571659 | -0.976517 | C  | -0.222621 | 2.699236  | 0.475260  |
| O                                                       | 0.210819  | -3.579207 | -1.434014 | C  | -0.085034 | 4.106017  | 0.495207  |
| C                                                       | -1.689567 | -2.648855 | -0.238336 | C  | 0.987577  | 4.668772  | 1.166316  |
| C                                                       | -2.686115 | -3.302457 | -1.222511 | C  | 1.928635  | 3.862668  | 1.844823  |
| N                                                       | -2.095658 | -1.265241 | 0.114565  | C  | 1.811786  | 2.482126  | 1.860212  |
| C                                                       | -3.267098 | -1.080957 | 0.782922  | N  | -1.239662 | 1.967746  | -0.074368 |
| O                                                       | -4.057054 | -1.991953 | 1.075536  | C  | -2.401723 | 2.438762  | -0.648910 |
| C                                                       | -1.482908 | -3.534768 | 1.009845  | O  | -2.632617 | 3.613667  | -0.919145 |
| C                                                       | -1.396811 | 2.784056  | -0.452138 | N  | 0.431968  | 0.541602  | 1.104315  |
| C                                                       | -1.035716 | 3.740071  | 0.705994  | C  | 1.045677  | -0.496204 | 1.768502  |
| C                                                       | -2.365240 | 3.460739  | -1.447864 | O  | 2.095248  | -0.408318 | 2.404299  |
| O                                                       | 0.110470  | 0.076840  | 1.404860  | Fe | -1.023034 | 0.086594  | -0.021609 |
| O                                                       | -3.769158 | 2.498279  | 0.985241  | N  | -0.982419 | -1.534494 | 0.894918  |
| H                                                       | 0.867834  | -0.539745 | 1.334751  | C  | -1.838331 | -2.566098 | 0.649654  |
| H                                                       | -0.778482 | -3.061986 | 1.703595  | N  | -3.074613 | -2.291433 | 0.025992  |
| H                                                       | -1.069798 | -4.501109 | 0.704601  | C  | -3.898661 | -3.490104 | -0.175323 |
| H                                                       | -2.432888 | -3.689363 | 1.522905  | O  | -0.266424 | -0.201265 | -1.426412 |
| H                                                       | -3.645480 | -3.466449 | -0.731991 | N  | -2.853951 | 0.049865  | -0.377610 |
| H                                                       | -2.279041 | -4.257308 | -1.567528 | C  | -3.418958 | 1.311375  | -0.923441 |
| H                                                       | -2.839407 | -2.655860 | -2.094458 | C  | -4.725026 | 1.733842  | -0.212718 |
| H                                                       | 2.207224  | -2.716441 | -2.321605 | C  | -3.629976 | -1.071625 | -0.444490 |
| H                                                       | 4.084370  | -1.609020 | -3.532916 | O  | -4.781892 | -1.083712 | -0.898576 |
| H                                                       | -4.881494 | -0.560648 | 2.633574  | C  | -3.616575 | 1.226403  | -2.453148 |
| H                                                       | -0.351118 | 3.251145  | 1.408113  | C  | 0.273742  | -1.825390 | 1.633443  |
| H                                                       | -0.539264 | 4.627797  | 0.302144  | C  | 1.203526  | -2.825797 | 0.907050  |
| H                                                       | -1.937166 | 4.039146  | 1.242275  | C  | -0.026379 | -2.309767 | 3.069630  |
| H                                                       | -3.274625 | 3.775545  | -0.936212 | O  | -1.598610 | -3.749804 | 0.939764  |
| H                                                       | -1.872792 | 4.329395  | -1.894213 | C  | 3.239105  | 0.800078  | -1.725228 |
| H                                                       | -2.633023 | 2.764593  | -2.251534 | C  | 4.527459  | 0.077924  | -1.405742 |
| H                                                       | 2.411282  | 2.262802  | -2.622232 | C  | 4.750149  | -0.458095 | -0.126387 |
| H                                                       | 4.187657  | 0.868039  | -3.679359 | C  | 5.937621  | -1.126722 | 0.171514  |
| H                                                       | -5.716228 | 0.416586  | 1.409509  | C  | 6.931060  | -1.273792 | -0.800833 |
| H                                                       | -4.732808 | 1.222893  | 2.645982  | C  | 6.722955  | -0.745717 | -2.075151 |
| C                                                       | 2.651087  | -1.973651 | 1.735285  | C  | 5.531972  | -0.076988 | -2.370114 |
| H                                                       | 2.535620  | -2.378978 | 0.734915  | O  | -0.295283 | -3.010881 | -2.205614 |
| C                                                       | 3.513839  | -0.886606 | 1.985786  | H  | 2.366695  | 0.137461  | -1.668545 |
| H                                                       | 2.143502  | -2.482796 | 2.549036  | H  | -2.682638 | 0.914194  | -2.932830 |
| C                                                       | 3.710501  | -0.386639 | 3.309489  | H  | -3.903798 | 2.209013  | -2.842233 |
| C                                                       | 4.557812  | 0.684589  | 3.549934  | H  | -4.394736 | 0.496122  | -2.681543 |
| C                                                       | 5.241925  | 1.301953  | 2.490378  | H  | -5.525591 | 1.035623  | -0.452978 |
| C                                                       | 5.066578  | 0.828684  | 1.180167  | H  | -4.993462 | 2.745483  | -0.531947 |
| C                                                       | 4.222574  | -0.242299 | 0.925318  | H  | -4.577972 | 1.741093  | 0.874306  |
| H                                                       | 3.183025  | -0.862164 | 4.132599  | H  | -0.816787 | 4.706381  | -0.028159 |
| H                                                       | 4.693046  | 1.047612  | 4.565276  | H  | 1.111127  | 5.748976  | 1.164640  |
| H                                                       | 5.904007  | 2.140929  | 2.683700  | H  | -4.840661 | -3.170350 | -0.611392 |
| H                                                       | 5.595871  | 1.303706  | 0.358409  | H  | 1.292740  | -2.573988 | -0.153864 |
| H                                                       | 4.090034  | -0.605265 | -0.090586 | H  | 2.196483  | -2.791037 | 1.366652  |
| <b>Doublet Reactant, 1 explicit H<sub>2</sub>O, gas</b> |           |           |           | H  | 0.797823  | -3.835035 | 0.987775  |

|   |           |           |           |
|---|-----------|-----------|-----------|
| H | -0.532592 | -3.275427 | 3.031127  |
| H | 0.910805  | -2.402122 | 3.627116  |
| H | -0.671100 | -1.590377 | 3.588540  |
| H | 2.522138  | 1.851566  | 2.377271  |
| H | 2.764677  | 4.332279  | 2.357180  |
| H | -4.065072 | -3.995679 | 0.779442  |
| H | -3.386774 | -4.189574 | -0.842773 |
| H | 3.056109  | 1.615870  | -1.015347 |
| H | 3.263322  | 1.229876  | -2.732539 |
| H | 5.376343  | 0.330237  | -3.367268 |
| H | 7.486139  | -0.853402 | -2.843068 |
| H | 7.855857  | -1.796156 | -0.566711 |
| H | 6.085889  | -1.535612 | 1.168334  |
| H | 3.986447  | -0.353242 | 0.641060  |
| H | -0.292231 | -2.055632 | -1.993240 |
| H | -0.544899 | -3.431475 | -1.369044 |

**Doublet TS1, 1 explicit H<sub>2</sub>O, gas**

|    |           |           |           |
|----|-----------|-----------|-----------|
| C  | 4.131772  | 0.119869  | -0.399913 |
| C  | 3.454154  | 0.212809  | -1.635798 |
| C  | 3.962824  | -0.516504 | -2.731614 |
| C  | 5.112254  | -1.290060 | -2.605698 |
| C  | 5.778773  | -1.360687 | -1.378048 |
| C  | 5.281057  | -0.655373 | -0.277354 |
| C  | 2.241349  | 1.024272  | -1.770560 |
| O  | 0.104979  | -0.291589 | -1.328810 |
| Fe | -0.793778 | 0.085899  | 0.079127  |
| N  | -2.554053 | -0.347974 | -0.343381 |
| C  | -3.094707 | -1.604223 | -0.338615 |
| O  | -4.208970 | -1.872723 | -0.804592 |
| N  | -1.345307 | 1.863025  | -0.191671 |
| C  | -2.543252 | 2.056928  | -0.817873 |
| C  | -3.333510 | 0.739699  | -0.988550 |
| C  | -3.503096 | 0.495657  | -2.503786 |
| C  | -0.458761 | 2.844803  | 0.254877  |
| C  | -0.511011 | 4.224756  | 0.016175  |
| C  | 0.464917  | 5.049752  | 0.581186  |
| C  | 1.483517  | 4.514305  | 1.374882  |
| C  | 1.551239  | 3.139617  | 1.620405  |
| C  | 0.579277  | 2.299202  | 1.060078  |
| N  | 0.464751  | 0.908799  | 1.195026  |
| C  | 1.202273  | 0.095052  | 2.008893  |
| C  | 0.692867  | -1.363594 | 2.015160  |
| C  | 0.326206  | -1.703184 | 3.477030  |
| O  | -2.996302 | 3.136568  | -1.199272 |
| O  | 2.170928  | 0.446763  | 2.686885  |
| N  | -0.512906 | -1.416750 | 1.153056  |
| C  | -1.118869 | -2.618664 | 0.954791  |
| O  | -0.679266 | -3.701316 | 1.378544  |

|   |           |           |           |
|---|-----------|-----------|-----------|
| N | -2.319411 | -2.656432 | 0.213785  |
| C | -2.851880 | -4.012309 | 0.033564  |
| C | -4.699412 | 0.964351  | -0.302891 |
| C | 1.856623  | -2.258911 | 1.531586  |
| H | 1.207799  | 0.319482  | -1.474912 |
| H | -2.526836 | 0.312429  | -2.966878 |
| H | -3.946940 | 1.385185  | -2.962818 |
| H | -4.144284 | -0.371028 | -2.673050 |
| H | -5.360211 | 0.117140  | -0.484463 |
| H | -5.141442 | 1.884488  | -0.696666 |
| H | -4.562246 | 1.082282  | 0.778785  |
| H | -1.313556 | 4.620809  | -0.591863 |
| H | 0.425978  | 6.121319  | 0.398299  |
| H | -3.765786 | -3.930912 | -0.548094 |
| H | 2.021351  | -2.143195 | 0.456269  |
| H | 2.767852  | -1.964181 | 2.061543  |
| H | 1.633542  | -3.306953 | 1.733091  |
| H | 0.005285  | -2.744750 | 3.542370  |
| H | 1.198979  | -1.541357 | 4.117164  |
| H | -0.486910 | -1.056093 | 3.826024  |
| H | 2.324125  | 2.709479  | 2.243310  |
| H | 2.234660  | 5.169175  | 1.810722  |
| H | -3.058194 | -4.474958 | 1.002919  |
| H | -2.115317 | -4.629787 | -0.487655 |
| H | 2.143227  | 1.850091  | -1.064297 |
| H | 1.988703  | 1.316829  | -2.792634 |
| H | 3.441486  | -0.468175 | -3.684550 |
| H | 5.488037  | -1.843739 | -3.462473 |
| H | 6.674753  | -1.968260 | -1.277831 |
| H | 5.787045  | -0.715516 | 0.682695  |
| H | 3.739024  | 0.645775  | 0.466115  |
| H | 0.517868  | -2.225239 | -1.532898 |
| O | 0.711352  | -3.179385 | -1.607449 |
| H | 0.479313  | -3.530312 | -0.733246 |

**Quartet Intermediate, 1 explicit H<sub>2</sub>O, gas**

|   |           |           |           |
|---|-----------|-----------|-----------|
| C | 0.567119  | 2.221682  | 1.048268  |
| C | -0.492466 | 2.826588  | 0.312778  |
| C | -0.505132 | 4.214507  | 0.112419  |
| C | 0.525920  | 4.987012  | 0.650274  |
| C | 1.561037  | 4.394454  | 1.381835  |
| C | 1.591993  | 3.012919  | 1.587068  |
| N | -1.436343 | 1.891269  | -0.112030 |
| C | -2.633325 | 2.139432  | -0.728662 |
| O | -3.058017 | 3.243770  | -1.065920 |
| N | 0.412377  | 0.832771  | 1.144265  |
| C | 1.140471  | -0.030827 | 1.916654  |
| O | 2.132543  | 0.264598  | 2.586908  |

|    |           |           |           |
|----|-----------|-----------|-----------|
| Fe | -0.936364 | 0.093947  | 0.074275  |
| N  | -0.665930 | -1.454191 | 1.078181  |
| C  | -1.303489 | -2.634223 | 0.837066  |
| N  | -2.515988 | -2.615575 | 0.113359  |
| C  | -3.079756 | -3.952560 | -0.110986 |
| O  | -0.061263 | -0.285059 | -1.443042 |
| N  | -2.696519 | -0.287992 | -0.374322 |
| C  | -3.458626 | 0.849726  | -0.949487 |
| C  | -4.806065 | 1.072185  | -0.226126 |
| C  | -3.269850 | -1.528650 | -0.405139 |
| O  | -4.392869 | -1.755949 | -0.870622 |
| C  | -3.664339 | 0.686861  | -2.471185 |
| C  | 0.582098  | -1.473530 | 1.882409  |
| C  | 1.693407  | -2.378343 | 1.299316  |
| C  | 0.276944  | -1.872559 | 3.342997  |
| O  | -0.883106 | -3.741817 | 1.210454  |
| C  | 3.002214  | 1.243198  | -1.722613 |
| C  | 4.058453  | 0.337291  | -1.498283 |
| C  | 4.489862  | 0.015150  | -0.175508 |
| C  | 5.540562  | -0.865552 | 0.033323  |
| C  | 6.202599  | -1.459549 | -1.051292 |
| C  | 5.791023  | -1.165303 | -2.359767 |
| C  | 4.741196  | -0.288569 | -2.583877 |
| O  | 0.397288  | -3.146686 | -1.837160 |
| H  | 0.836612  | 0.092920  | -1.372880 |
| H  | -2.702277 | 0.508308  | -2.964023 |
| H  | -4.100637 | 1.606198  | -2.875192 |
| H  | -4.326268 | -0.158040 | -2.668525 |
| H  | -5.489147 | 0.249137  | -0.434801 |
| H  | -5.235092 | 2.018935  | -0.567804 |
| H  | -4.646354 | 1.135348  | 0.857030  |
| H  | -1.320417 | 4.656118  | -0.445155 |
| H  | 0.518209  | 6.063947  | 0.498094  |
| H  | -4.007750 | -3.828225 | -0.661810 |
| H  | 1.799155  | -2.228412 | 0.220433  |
| H  | 2.641411  | -2.129015 | 1.785898  |
| H  | 1.453631  | -3.427648 | 1.473384  |
| H  | -0.067627 | -2.907919 | 3.375394  |
| H  | 1.184003  | -1.761215 | 3.944901  |
| H  | -0.501074 | -1.223484 | 3.761222  |
| H  | 2.375963  | 2.539492  | 2.163115  |
| H  | 2.353386  | 5.011627  | 1.799013  |
| H  | -3.266855 | -4.453215 | 0.842908  |
| H  | -2.371012 | -4.559556 | -0.681251 |
| H  | 2.533396  | 1.776671  | -0.901943 |
| H  | 2.683223  | 1.488734  | -2.731336 |
| H  | 4.421319  | -0.066540 | -3.599201 |
| H  | 6.294205  | -1.631121 | -3.203800 |
| H  | 7.022842  | -2.151580 | -0.879361 |
| H  | 5.845422  | -1.101455 | 1.049775  |

|   |          |           |           |
|---|----------|-----------|-----------|
| H | 3.966892 | 0.448923  | 0.672657  |
| H | 0.187377 | -2.196015 | -1.742470 |
| H | 0.192025 | -3.518408 | -0.965436 |

### Doublet Reactant, 2 explicit H<sub>2</sub>O, gas

|    |           |           |           |
|----|-----------|-----------|-----------|
| C  | 5.882754  | -1.451515 | -0.020572 |
| C  | 4.668877  | -0.791201 | -0.211361 |
| C  | 4.443896  | -0.008726 | -1.356420 |
| C  | 5.474022  | 0.084062  | -2.302000 |
| C  | 6.691451  | -0.575856 | -2.115511 |
| C  | 6.901723  | -1.346611 | -0.971707 |
| C  | 3.133338  | 0.715451  | -1.550419 |
| O  | -0.228558 | -0.204643 | -1.312872 |
| Fe | -1.003841 | 0.028878  | 0.109339  |
| N  | -1.280263 | -1.681580 | 0.780425  |
| C  | -2.285734 | -2.502320 | 0.359106  |
| O  | -2.257607 | -3.739164 | 0.461542  |
| N  | -0.885133 | 1.911959  | 0.320932  |
| C  | -1.913486 | 2.654651  | -0.229903 |
| C  | -3.111679 | 1.780808  | -0.649749 |
| C  | -3.307051 | 1.966110  | -2.171781 |
| C  | 0.200381  | 2.368824  | 1.011478  |
| C  | 0.976886  | 1.295542  | 1.598532  |
| C  | 2.092091  | 1.603236  | 2.414775  |
| C  | 2.431052  | 2.928442  | 2.617242  |
| C  | 1.673464  | 3.976871  | 2.041307  |
| C  | 0.566040  | 3.714079  | 1.255685  |
| N  | 0.458549  | 0.064205  | 1.325642  |
| C  | 0.865667  | -1.157470 | 1.824186  |
| O  | 1.891101  | -1.347595 | 2.472770  |
| O  | -1.893124 | 3.872258  | -0.382989 |
| N  | -2.789405 | 0.371147  | -0.296570 |
| C  | -3.754565 | -0.571540 | -0.512688 |
| O  | -4.883120 | -0.312105 | -0.948148 |
| N  | -3.431892 | -1.926185 | -0.227848 |
| C  | -4.440022 | -2.919173 | -0.621887 |
| C  | -0.115850 | -2.295579 | 1.472343  |
| C  | -0.542797 | -2.939794 | 2.810117  |
| C  | 0.658343  | -3.312463 | 0.600382  |
| C  | -4.327190 | 2.320654  | 0.140387  |
| O  | 0.221898  | 2.101468  | -2.898428 |
| H  | 2.272255  | 0.049047  | -1.428923 |
| H  | -2.398553 | 1.682018  | -2.712231 |
| H  | -3.513488 | 3.020713  | -2.382891 |
| H  | -4.145296 | 1.354466  | -2.509069 |
| H  | -5.236169 | 1.818932  | -0.188491 |
| H  | -4.410112 | 3.399463  | -0.023520 |
| H  | -4.193311 | 2.139988  | 1.214096  |
| H  | -0.022646 | 4.503572  | 0.808372  |

|   |           |           |           |
|---|-----------|-----------|-----------|
| H | 1.972900  | 5.007506  | 2.213748  |
| H | -5.301940 | -2.377975 | -1.001172 |
| H | 0.826552  | -2.913378 | -0.404031 |
| H | 1.625361  | -3.522116 | 1.068768  |
| H | 0.086176  | -4.236692 | 0.512032  |
| H | -1.200313 | -3.787813 | 2.613609  |
| H | 0.345700  | -3.275875 | 3.353318  |
| H | -1.077136 | -2.211357 | 3.431741  |
| H | 2.661390  | 0.791242  | 2.845985  |
| H | 3.300900  | 3.169959  | 3.222637  |
| H | -4.716515 | -3.534208 | 0.238170  |
| H | -4.032892 | -3.578835 | -1.393832 |
| H | 3.014669  | 1.516039  | -0.808205 |
| H | 3.054760  | 1.173966  | -2.540335 |
| H | 5.315975  | 0.680471  | -3.198211 |
| H | 7.473357  | -0.489019 | -2.867102 |
| H | 7.846757  | -1.864277 | -0.823628 |
| H | 6.030933  | -2.054175 | 0.872647  |
| H | 3.883159  | -0.887031 | 0.535161  |
| H | 0.091260  | 1.254955  | -2.418570 |
| H | 0.025123  | 2.770400  | -2.226684 |
| H | -0.600786 | -1.914956 | -2.153171 |
| O | -0.779780 | -2.812169 | -2.500442 |
| H | -1.117351 | -3.295981 | -1.731785 |

**Doublet TS1, 2 explicit H<sub>2</sub>O, gas**

|    |           |           |           |
|----|-----------|-----------|-----------|
| C  | -1.236271 | 2.634775  | 2.775031  |
| C  | -0.439488 | 2.020692  | 1.799939  |
| C  | -0.011648 | 2.755127  | 0.660105  |
| C  | -0.386664 | 4.096107  | 0.504647  |
| C  | -1.180834 | 4.695291  | 1.485646  |
| C  | -1.599723 | 3.973660  | 2.607462  |
| N  | 0.031622  | 0.700450  | 1.783984  |
| C  | -0.058237 | -0.221057 | 2.794038  |
| O  | -0.640421 | -0.053586 | 3.865180  |
| N  | 0.801668  | 1.986071  | -0.177050 |
| C  | 1.454108  | 2.387918  | -1.304194 |
| O  | 1.319623  | 3.479186  | -1.865758 |
| Fe | 0.811848  | 0.142084  | 0.184151  |
| N  | 2.243960  | 0.091740  | -1.002959 |
| C  | 3.031379  | -0.993160 | -1.276786 |
| N  | 2.781561  | -2.189139 | -0.554417 |
| C  | 3.469353  | -3.391245 | -1.041301 |
| O  | -0.543158 | -0.432773 | -0.711176 |
| N  | 1.349085  | -1.356307 | 1.156237  |
| C  | 0.665614  | -1.544153 | 2.458869  |
| C  | 1.696907  | -1.793476 | 3.580574  |
| C  | 2.027806  | -2.406359 | 0.617275  |
| O  | 2.026568  | -3.555422 | 1.090020  |

|   |           |           |           |
|---|-----------|-----------|-----------|
| C | -0.405696 | -2.660797 | 2.457441  |
| C | 2.428601  | 1.312985  | -1.830661 |
| C | 2.095680  | 1.064245  | -3.316879 |
| C | 3.846803  | 1.909259  | -1.668711 |
| O | 3.920789  | -0.996209 | -2.135721 |
| O | -1.408623 | 1.558694  | -2.674169 |
| O | -0.617162 | -3.398969 | -0.873721 |
| C | -2.857856 | 0.088339  | 0.251222  |
| C | -3.840739 | -0.601031 | -0.589263 |
| C | -4.459765 | -1.792402 | -0.155491 |
| C | -5.393806 | -2.442020 | -0.956118 |
| C | -5.719304 | -1.923724 | -2.214070 |
| C | -5.097070 | -0.755138 | -2.667877 |
| C | -4.165081 | -0.099124 | -1.870030 |
| H | -1.701122 | -0.238102 | -0.160193 |
| H | -1.030195 | -2.605130 | 1.560424  |
| H | -1.035701 | -2.542277 | 3.345139  |
| H | 0.071607  | -3.641282 | 2.472630  |
| H | 2.196812  | -2.749952 | 3.415298  |
| H | 1.184267  | -1.802987 | 4.547223  |
| H | 2.447716  | -0.994971 | 3.592726  |
| H | -1.544885 | 2.063617  | 3.640281  |
| H | -2.216898 | 4.454669  | 3.362790  |
| H | 2.736704  | -4.179717 | -1.230535 |
| H | 1.065406  | 0.709952  | -3.425642 |
| H | 2.183224  | 2.010499  | -3.860023 |
| H | 2.783165  | 0.329168  | -3.737107 |
| H | 4.587305  | 1.239611  | -2.106176 |
| H | 3.880180  | 2.884314  | -2.164940 |
| H | 4.077959  | 2.050776  | -0.606177 |
| H | -0.048098 | 4.640630  | -0.366974 |
| H | -1.474012 | 5.736131  | 1.369409  |
| H | 4.178994  | -3.759320 | -0.294184 |
| H | 3.993876  | -3.123152 | -1.954159 |
| H | -2.799656 | 1.169607  | 0.114388  |
| H | -2.850118 | -0.200635 | 1.303789  |
| H | -4.199746 | -2.198416 | 0.818803  |
| H | -5.865583 | -3.356059 | -0.604490 |
| H | -6.445689 | -2.434258 | -2.841777 |
| H | -5.335624 | -0.359563 | -3.651950 |
| H | -3.647946 | 0.785983  | -2.232636 |
| H | -1.055875 | 0.849906  | -2.100085 |
| H | -0.856922 | 2.328106  | -2.461901 |
| H | -0.570157 | -2.424085 | -0.879916 |
| H | 0.082353  | -3.662590 | -0.254970 |

**Quartet Intermediate, 2 explicit H<sub>2</sub>O, gas**

|   |           |           |           |
|---|-----------|-----------|-----------|
| C | -4.412759 | -0.587499 | -2.135634 |
|---|-----------|-----------|-----------|





|   |           |           |           |    |          |           |           |
|---|-----------|-----------|-----------|----|----------|-----------|-----------|
| O | 4.053904  | 2.179836  | -1.306023 | N  | 2.582108 | -1.305711 | -0.777619 |
| N | 3.823564  | -0.028128 | -0.756757 | C  | 1.941441 | -0.089016 | -0.806256 |
| C | 5.098544  | -0.266679 | -1.454448 | C  | 2.194613 | 0.691277  | -2.103724 |
| C | 2.640158  | -2.742650 | 2.455884  | N  | 2.975869 | -0.187409 | -2.992395 |
| C | 1.348832  | 3.382268  | -1.838529 | C  | 3.258149 | 0.256134  | -4.237926 |
| O | 1.724551  | -1.521371 | -2.923354 | O  | 2.937774 | 1.365723  | -4.688402 |
| O | -1.673153 | 1.583673  | -2.217585 | N  | 3.789853 | -3.376678 | -1.327771 |
| O | 3.825220  | -3.454930 | -2.485760 | C  | 4.216687 | -4.424874 | -2.077875 |
| H | 0.637301  | -3.098628 | -0.393855 | C  | 4.501172 | -4.002868 | -3.532908 |
| H | 0.947779  | -4.277622 | 0.902156  | C  | 3.699824 | -4.962334 | -4.436401 |
| H | 2.272287  | -3.746069 | -0.170696 | Fe | 3.808189 | -1.652785 | -2.120642 |
| H | 3.553010  | -3.151207 | 2.025700  | N  | 4.054824 | -2.589546 | -3.686170 |
| H | 2.134559  | -3.499709 | 3.062480  | C  | 4.240646 | -2.000938 | -4.918832 |
| H | 2.903774  | -1.897721 | 3.103811  | O  | 4.673734 | -2.626598 | -5.894748 |
| H | -2.026050 | -1.406285 | 3.492008  | O  | 5.199981 | -1.065915 | -1.651308 |
| H | -3.784388 | 0.161647  | 4.308322  | N  | 3.965966 | -0.637439 | -5.089494 |
| H | 5.017075  | -1.184491 | -2.040102 | C  | 4.297822 | -0.130168 | -6.424016 |
| H | 0.643273  | 2.719381  | -2.349044 | O  | 1.245994 | 0.359243  | 0.102356  |
| H | 0.928634  | 4.393344  | -1.844055 | O  | 4.354894 | -5.589619 | -1.699633 |
| H | 2.306906  | 3.381149  | -2.359912 | C  | 0.808744 | 1.041953  | -2.688803 |
| H | 3.399174  | 4.047369  | -0.098086 | C  | 2.975843 | 1.970196  | -1.723811 |
| H | 1.922838  | 4.904036  | 0.440883  | C  | 6.022246 | -4.151062 | -3.756597 |
| H | 2.605203  | 3.587536  | 1.424565  | H  | 3.957281 | 1.703053  | -1.316413 |
| H | -2.197898 | 3.326713  | 1.834274  | H  | 2.419098 | 2.528345  | -0.963713 |
| H | -3.866468 | 2.501426  | 3.490251  | H  | 3.117170 | 2.587678  | -2.612640 |
| H | 5.919214  | -0.382675 | -0.738912 | H  | 0.920835 | 1.686328  | -3.560711 |
| H | 5.290530  | 0.592249  | -2.091828 | H  | 0.214655 | 1.542980  | -1.918535 |
| H | -3.276462 | -1.988373 | 0.349663  | H  | 0.285269 | 0.126622  | -2.989698 |
| H | -3.071667 | -2.890760 | -1.151530 | H  | 1.318147 | -1.220194 | 1.712416  |
| H | -5.752932 | -3.005468 | -0.511008 | H  | 1.385910 | -3.111757 | 3.339270  |
| H | -7.917427 | -2.128311 | -1.328280 | H  | 4.158852 | 0.947623  | -6.406701 |
| H | -8.004598 | 0.044013  | -2.545734 | H  | 6.565366 | -3.435427 | -3.128624 |
| H | -5.898617 | 1.316467  | -2.932865 | H  | 6.323327 | -5.163962 | -3.469506 |
| H | -3.734217 | 0.435422  | -2.115232 | H  | 6.272520 | -3.969895 | -4.802729 |
| H | -1.068196 | 0.896333  | -1.853757 | H  | 3.953927 | -4.803235 | -5.483933 |
| H | -1.811767 | 2.183269  | -1.469125 | H  | 3.927489 | -5.990141 | -4.138288 |
| H | 3.019015  | -2.925429 | -2.656203 | H  | 2.624624 | -4.795382 | -4.301418 |
| H | 4.076841  | -3.174821 | -1.587792 | H  | 3.782878 | -5.410528 | 0.576020  |
| H | 1.072359  | -1.217107 | -2.251537 | H  | 2.610135 | -5.199698 | 2.777327  |
| H | 2.344481  | -0.777890 | -2.967222 | H  | 3.648098 | -0.574611 | -7.186397 |
| H | -2.432134 | -1.246166 | -1.014564 | H  | 5.329337 | -0.392198 | -6.667993 |

#### Doublet catalyst

|   |          |           |           |
|---|----------|-----------|-----------|
| C | 1.854237 | -2.131254 | 1.486704  |
| C | 2.527085 | -2.246150 | 0.262174  |
| C | 3.230664 | -3.435851 | -0.056055 |
| C | 3.255657 | -4.505945 | 0.848643  |
| C | 2.588224 | -4.375593 | 2.067538  |
| C | 1.897524 | -3.200870 | 2.383564  |

#### Quartet catalyst

|   |          |           |           |
|---|----------|-----------|-----------|
| C | 6.164681 | 12.289205 | 13.460940 |
| C | 4.905542 | 12.350671 | 14.064242 |
| C | 4.825648 | 12.414064 | 15.460559 |
| C | 6.007951 | 12.412356 | 16.244922 |
| C | 7.263219 | 12.347246 | 15.628350 |
| C | 7.329411 | 12.287512 | 14.233633 |

|    |           |           |           |    |           |           |           |
|----|-----------|-----------|-----------|----|-----------|-----------|-----------|
| N  | 3.667507  | 12.464371 | 16.248224 | N  | 4.248131  | -0.287707 | -4.176396 |
| C  | 2.380867  | 12.241491 | 15.843236 | C  | 4.860739  | -1.495165 | -4.190958 |
| O  | 2.020509  | 12.026750 | 14.686345 | O  | 4.415492  | -2.562661 | -3.758621 |
| N  | 5.732591  | 12.461490 | 17.618254 | N  | 4.294687  | 2.133171  | -3.586461 |
| C  | 6.605427  | 12.234736 | 18.645825 | C  | 4.531658  | 3.493964  | -3.504176 |
| O  | 7.810792  | 12.016817 | 18.527661 | O  | 3.825151  | 4.287469  | -2.887685 |
| Fe | 3.929227  | 12.834686 | 18.095777 | Fe | 5.251896  | 1.222688  | -4.846336 |
| N  | 2.132327  | 12.340882 | 18.276780 | N  | 6.351249  | 2.766057  | -4.934132 |
| C  | 1.365109  | 12.269611 | 17.010983 | C  | 7.553030  | 2.877594  | -5.527777 |
| C  | 0.480491  | 13.519470 | 16.801279 | N  | 8.160097  | 1.645492  | -5.932181 |
| O  | 3.813179  | 14.454633 | 18.271404 | C  | 9.433922  | 1.765170  | -6.647279 |
| N  | 4.460468  | 12.339149 | 19.821336 | O  | 4.324951  | 1.213641  | -6.316081 |
| C  | 3.626588  | 12.493683 | 20.890061 | N  | 6.609946  | 0.034604  | -4.997204 |
| N  | 2.244290  | 12.708495 | 20.635647 | C  | 6.278987  | -1.412571 | -4.808718 |
| C  | 1.472318  | 12.495682 | 19.460845 | C  | 7.236890  | -2.092230 | -3.809866 |
| O  | 0.242109  | 12.435372 | 19.575047 | C  | 7.834139  | 0.328975  | -5.586272 |
| C  | 5.924708  | 12.262970 | 20.035763 | O  | 8.648378  | -0.558242 | -5.870269 |
| C  | 6.312628  | 10.967323 | 20.773046 | C  | 6.236434  | -2.174867 | -6.151748 |
| C  | 6.465665  | 13.510263 | 20.770857 | C  | 5.766098  | 3.955941  | -4.298081 |
| O  | 3.999754  | 12.431445 | 22.067758 | C  | 5.288019  | 4.979530  | -5.351860 |
| C  | 1.443228  | 12.939124 | 21.842628 | C  | 6.717107  | 4.622478  | -3.277473 |
| C  | 0.531930  | 10.976091 | 16.937438 | O  | 8.172546  | 3.931619  | -5.739237 |
| H  | 6.156318  | 14.419087 | 20.242931 | H  | 3.729261  | 0.441056  | -6.252981 |
| H  | 7.559612  | 13.468742 | 20.788217 | H  | 5.600812  | -1.642976 | -6.870008 |
| H  | 6.077876  | 13.542192 | 21.790184 | H  | 5.805214  | -3.165910 | -5.974832 |
| H  | 5.932860  | 10.991740 | 21.795589 | H  | 7.236820  | -2.273125 | -6.574282 |
| H  | 7.402747  | 10.873126 | 20.773582 | H  | 8.238710  | -2.167421 | -4.232309 |
| H  | 5.889320  | 10.098012 | 20.256942 | H  | 6.845098  | -3.085133 | -3.571804 |
| H  | 8.152657  | 12.332635 | 16.243829 | H  | 7.284060  | -1.511711 | -2.880868 |
| H  | 8.302453  | 12.239172 | 13.749729 | H  | 2.230944  | -1.826753 | -3.045051 |
| H  | 2.050659  | 13.490556 | 22.557834 | H  | 0.487496  | -0.887788 | -1.515561 |
| H  | 1.089251  | 14.426685 | 16.883273 | H  | 9.436477  | 1.090805  | -7.506502 |
| H  | 0.039205  | 13.481340 | 15.800001 | H  | 4.617755  | 4.492488  | -6.068978 |
| H  | -0.307915 | 13.551452 | 17.554822 | H  | 4.746381  | 5.794901  | -4.861147 |
| H  | -0.262329 | 11.000743 | 17.685073 | H  | 6.154615  | 5.372262  | -5.887860 |
| H  | 0.107230  | 10.885140 | 15.933148 | H  | 7.577915  | 5.050096  | -3.791886 |
| H  | 1.169971  | 10.104848 | 17.124757 | H  | 6.173380  | 5.402448  | -2.735547 |
| H  | 3.992645  | 12.338722 | 13.484065 | H  | 7.072562  | 3.879886  | -2.552721 |
| H  | 6.232122  | 12.242184 | 12.376251 | H  | 2.282592  | 3.020546  | -1.868804 |
| H  | 1.130415  | 11.994857 | 22.305296 | H  | 0.514763  | 1.529200  | -0.935286 |
| H  | 0.552658  | 13.498687 | 21.562486 | H  | 10.276238 | 1.490700  | -6.002220 |
|    |           |           |           | H  | 9.534082  | 2.801854  | -6.958130 |

### Singlet Fe<sup>IV</sup>(OH)

|   |          |           |           |
|---|----------|-----------|-----------|
| C | 3.219779 | 1.445064  | -2.988621 |
| C | 3.195680 | 0.066447  | -3.333195 |
| C | 2.211869 | -0.773741 | -2.795128 |
| C | 1.253611 | -0.237239 | -1.932360 |
| C | 1.270634 | 1.121030  | -1.602464 |
| C | 2.253373 | 1.969433  | -2.119125 |

### Triplet Fe<sup>IV</sup>(OH)

|   |          |           |           |
|---|----------|-----------|-----------|
| C | 3.164092 | 1.495636  | -2.987588 |
| C | 3.302821 | 0.086285  | -3.149886 |
| C | 2.344419 | -0.782195 | -2.608513 |
| C | 1.259294 | -0.245299 | -1.912775 |
| C | 1.122345 | 1.138585  | -1.754193 |

|    |          |           |           |   |           |           |           |
|----|----------|-----------|-----------|---|-----------|-----------|-----------|
| C  | 2.067288 | 2.017700  | -2.287017 | H | 5.393080  | -1.621151 | -6.797746 |
| N  | 4.457228 | -0.248424 | -3.863899 | H | 5.705611  | -3.179584 | -5.993967 |
| C  | 4.978589 | -1.496662 | -4.071816 | H | 7.055275  | -2.252337 | -6.720261 |
| O  | 4.478302 | -2.559685 | -3.703694 | H | 8.299870  | -2.297844 | -4.493104 |
| N  | 4.216486 | 2.198268  | -3.579906 | H | 6.953408  | -3.187988 | -3.709781 |
| C  | 4.464940 | 3.541942  | -3.515847 | H | 7.525061  | -1.649411 | -3.029015 |
| O  | 3.769727 | 4.379488  | -2.940289 | H | 2.474567  | -1.849256 | -2.732701 |
| Fe | 5.323946 | 1.185005  | -4.702760 | H | 0.514565  | -0.915718 | -1.489342 |
| N  | 6.410692 | 2.695053  | -4.751088 | H | 9.435676  | 1.132281  | -7.521513 |
| C  | 7.604619 | 2.803309  | -5.403804 | H | 4.759489  | 4.328023  | -6.143674 |
| N  | 8.197100 | 1.611007  | -5.899214 | H | 4.776382  | 5.708056  | -5.018078 |
| C  | 9.443464 | 1.789703  | -6.650871 | H | 6.261703  | 5.254282  | -5.910436 |
| O  | 4.405856 | 1.262782  | -6.226327 | H | 7.538997  | 5.078142  | -3.705541 |
| N  | 6.693090 | -0.029918 | -5.034043 | H | 6.063610  | 5.478097  | -2.766971 |
| C  | 6.324369 | -1.452652 | -4.836333 | H | 6.959852  | 3.981196  | -2.430623 |
| C  | 7.353279 | -2.200965 | -3.961107 | H | 1.985283  | 3.089890  | -2.166177 |
| C  | 7.868211 | 0.251794  | -5.668459 | H | 0.271286  | 1.539762  | -1.208141 |
| O  | 8.670943 | -0.603254 | -6.067105 | H | 10.314751 | 1.526779  | -6.039331 |
| C  | 6.108319 | -2.178863 | -6.182676 | H | 9.508509  | 2.834226  | -6.943923 |
| C  | 5.767825 | 3.937044  | -4.253992 |   |           |           |           |
| C  | 5.366865 | 4.875093  | -5.413942 |   |           |           |           |
| C  | 6.649551 | 4.673909  | -3.222145 |   |           |           |           |
| O  | 8.195514 | 3.875307  | -5.594178 |   |           |           |           |
| H  | 3.483517 | 1.053934  | -5.992688 |   |           |           |           |
